# Supplementary material for: Glycan–protein cross-linking mass spectrometry reveals sialic acid-mediated protein networks on cell surfaces
Source: Chem Sci. 2021 May 18;12(25):8767–77. doi: 10.1039/d1sc00814e (PMC8246274; doi:10.1039/d1sc00814e)
Supplement: SC-012-D1SC00814E-s001 [file SC-012-D1SC00814E-s001.xlsx]

## Sheet: Combined
Peptide1 Score	Peptide2 Score	Peptide1	Protein1 (GeneName)	Protein1 (ID)	Start1	End1	Site1	Peptide2	Protein2 (GeneName)	Protein2 (ID)	Start2	End2	Site2	Linker	Comment	Pair
823	88	[AEFJITLIHPKDLTALSNmLPK]	AMPN	P15144	231	252	J234	[ANIKWVK]	AMPN	P15144	946	952	K952	Hex(5)HexNAc(4)Sia(1)	Known Interaction	P15144-P15144
734	131	[AJTTQPGIVEGGQVLO]	ITAV	P06756	73	88	J74	[LOTISLVIR]	PLEC	Q15149	1225	1233	K1226	Hex(5)HexNAc(4)Fuc(1)Sia(1)	Known Interaction	P06756-Q15149
728	125	[AJTTQPGIVEGGQVLKBDWSSTRR]	ITAV	P06756	73	96	J74	[IOELQNAGDRLLR]	PLEC	Q15149	809	821	K810	Hex(5)HexNAc(4)Fuc(1)Sia(1)	Known Interaction	P06756-Q15149
671	248	[LLAKHNIIPIFAVTJYSYSYYEK]	ITB4	P16144	313	335	J327	[ALHLMOTYTVNTLQTLTSQLLO]	COG3	Q96JB2	259	280	K264	Hex(5)HexNAc(4)Fuc(1)Sia(1)	Known Interaction	P16144-Q96JB2
644	137	[JITIVTGAPRHR]	ITA3	P26006	265	276	J265	[QVNOLIHAR]	PLXB2	O15031	1107	1115	K1110	Hex(5)HexNAc(4)Fuc(1)Sia(1)	Known Interaction	P26006-O15031
632	87	[JITLAYTLEADRDR]	ITA3	P26006	511	524	J511	[EALROAEO]	STIM1	Q13586	326	333	K330	Hex(5)HexNAc(4)Fuc(1)Sia(1)	Known Interaction	P26006-Q13586
598	83	[THJLTDLSPHLRYR]	L1CAM	P32004	977	990	J979	[GNIHLOPSFSDGLO]	ITB4	P16144	432	445	K437	Hex(5)HexNAc(4)Fuc(1)Sia(1)	Known Interaction	P32004-P16144
597	95	[OLJYTLSQGHRVVLR]	AMPN	P15144	126	140	J128	[QRLOPEIQBVSAO]	TRFM	P08582	389	401	K392	Hex(5)HexNAc(4)Fuc(1)Sia(1)	Known Interaction	P15144-P08582
593	106	[GDKJVTMGQSSARMK]	AGRE5	P48960	368	382	J371	[NLIOEIO]	ITA2	P17301	324	330	K327	Hex(5)HexNAc(4)Fuc(1)Sia(1)	Known Interaction	P48960-P17301
590	86	[FVAAVHYEQPTIQIELRQJTSQK]	TACD2	P09758	190	212	J208	[EFLTVYIONIFLNQVLAEINO]	EXOC4	Q96A65	526	546	K533	Hex(5)HexNAc(4)Fuc(1)Sia(1)	Known Interaction	P09758-Q96A65
575	80	[AJTTQPGIVEGGQVLO]	ITAV	P06756	73	88	J74	[OLLNO]	CTL2	Q8IWA5	694	698	K694	Hex(5)HexNAc(4)Fuc(2)Sia(1)	Known Interaction	P06756-Q8IWA5
560	93	[FVAAVHYEQPTIQIELRQJTSQO]	TACD2	P09758	190	212	J208	[EFLTVYIONIFLNQVLAEINO]	EXOC4	Q96A65	526	546	K533	Hex(5)HexNAc(4)Fuc(1)Sia(1)	Known Interaction	P09758-Q96A65
527	147	[AJTTQPGIVEGGQVLK]	ITAV	P06756	73	88	J74	[NOFIAAQGPO]	PTPRA	P18433	308	317	K309	Hex(5)HexNAc(4)Fuc(2)Sia(1)	Known Interaction	P06756-P18433
525	115	[DJTTVTRLLNINPNK]	LAMP1	P11279	248	262	J249	[QTLSIYQALOO]	PLEC	Q15149	3839	3849	K3848	Hex(5)HexNAc(4)Fuc(1)Sia(1)	Known Interaction	P11279-Q15149
500	91	[OLJYTLSQGHRVVLR]	AMPN	P15144	126	140	J128	[AVIVLNEGIOVQTO]	CBPD	O75976	1230	1243	K1239	Hex(5)HexNAc(4)Fuc(1)Sia(1)	Known Interaction	P15144-O75976
489	630	[VASVININPJTTHSTGSBR]	LAMP2	P13473	248	266	J257	[EAGJHTSGAGLVQINOSNGO]	MPRD	P20645	80	99	K95	Hex(5)HexNAc(4)Fuc(1)Sia(1)	Known Interaction	P13473-P20645
443	153	[KDJTTVTRLLNINPNK]	LAMP1	P11279	247	262	J249	[AGOSVGVVTTTR]	PPB1	P05187	161	172	K163	Hex(5)HexNAc(4)Fuc(1)Sia(1)	Known Interaction	P11279-P05187
431	255	[WRIKLDJYSTQELGK]	5NTD	P21589	327	341	J333	[YYSOIIISPEEJVTLTBTAENQLER]	CD166	Q13740	469	493	K472	Hex(5)HexNAc(4)Fuc(1)Sia(1)	Known Interaction	P21589-Q13740
430	81	[JVTMGQSSAR]	AGRE5	P48960	371	380	J371	[mFLLVGAPOAJTTQPGIVEGGQVLO]	ITAV	P06756	64	88	K72	Hex(5)HexNAc(4)Fuc(1)Sia(1)	Known Interaction	P48960-P06756
419	99	[EGIBNGFTALBPASDPKPJFTDBNR]	ADA10	O14672	533	557	J551	[EQLNEYOGHLSGLAO]	PLEC	Q15149	909	923	K915	Hex(5)HexNAc(4)Fuc(1)Sia(1)	Known Interaction	O14672-Q15149
417	83	[TBSSJLTLTSGSOHO]	CDCP1	Q9H5V8	382	396	J386	[VEIOELGELR]	TACD2	P09758	309	318	K312	Hex(5)HexNAc(4)Sia(2)	Known Interaction	Q9H5V8-P09758
408	215	[KLJYTLSQGHRVVLR]	AMPN	P15144	126	140	J128	[ILOSPQEVOPGEO]	ADA17	P78536	284	296	K286	Hex(5)HexNAc(4)Fuc(1)Sia(1)	Known Interaction	P15144-P78536
404	143	[KLJYTLSQGHRVVLR]	AMPN	P15144	126	140	J128	[GISLOGEEGIMGFPGLR]	CO4A2	P08572	288	304	K292	Hex(5)HexNAc(4)Fuc(1)Sia(1)	Known Interaction	P15144-P08572
392	81	[VPGJQTSTTLKLSPYVHYTFR]	L1CAM	P32004	668	688	J671	[AOVYFASLLTVALHGO]	PLXB2	O15031	1346	1361	K1347	Hex(5)HexNAc(4)Fuc(1)Sia(1)	Known Interaction	P32004-O15031
383	139	[RJITLAYTLEADR]	ITA3	P26006	510	522	J511	[AAVMVHQLSOO]	CTNB1	P35222	171	181	K180	Hex(5)HexNAc(4)Fuc(2)Sia(1)	Known Interaction	P26006-P35222
375	84	[RJITLAYTLEADR]	ITA3	P26006	510	522	J511	[OPTNOAPHPO]	TNR5	P25942	221	230	K221	Hex(5)HexNAc(4)Fuc(1)Sia(1)	Known Interaction	P26006-P25942
374	84	[DJTTVTRLLNINPNO]	LAMP1	P11279	248	262	J249	[GHLSGLAOR]	PLEC	Q15149	916	924	K923	Hex(5)HexNAc(4)Fuc(1)Sia(1)	Known Interaction	P11279-Q15149
359	102	[KLJYTLSQGHRVVLR]	AMPN	P15144	126	140	J128	[VLLEmROFR]	PTN1	P18031	249	257	K255	Hex(5)HexNAc(4)Fuc(1)Sia(1)	Known Interaction	P15144-P18031
352	120	[VPGJQTSTTLKLSPYVHYTFR]	L1CAM	P32004	668	688	J671	[OPWTAVDTSVDGROR]	MPRI	P11717	1104	1118	K1117	Hex(5)HexNAc(4)Fuc(1)Sia(1)	Known Interaction	P32004-P11717
349	95	[KDJTTVTRLLNINPNK]	LAMP1	P11279	247	262	J249	[ODRLVLSYVR]	MPRI	P11717	257	266	K257	Hex(5)HexNAc(4)Fuc(1)Sia(1)	Known Interaction	P11279-P11717
328	82	[KLJYTLSQGHRVVLR]	AMPN	P15144	126	140	J128	[AVAPGGATRLTDOAVO]	UBR4	Q5T4S7	5070	5085	K5082	Hex(5)HexNAc(4)Fuc(1)Sia(1)	Known Interaction	P15144-Q5T4S7
325	121	[KDFEDLYTPVJGSIVIVRAGK]	TFR1	P02786	241	261	J251	[VYTRHGVPISVTGIAQVOIQGQNO]	FLOT1	O75955	55	78	K72	Hex(5)HexNAc(4)Fuc(3)Sia(1)	Known Interaction	P02786-O75955
324	89	[JITIVTGAPRHR]	ITA3	P26006	265	276	J265	[AEAEAAREOQR]	PLEC	Q15149	1660	1670	K1668	Hex(5)HexNAc(4)Fuc(1)Sia(1)	Known Interaction	P26006-Q15149
324	87	[IKLDJYSTQELGK]	5NTD	P21589	329	341	J333	[AALEEVERLOAO]	PLEC	Q15149	2143	2154	K2152	Hex(5)HexNAc(4)Fuc(1)Sia(1)	Known Interaction	P21589-Q15149
303	96	[JITIVTGAPRHR]	ITA3	P26006	265	276	J265	[RGVSMGTPOLLR]	MPRI	P11717	1768	1779	K1776	Hex(5)HexNAc(4)Fuc(1)Sia(1)	Known Interaction	P26006-P11717
300	80	[KDJTTVTRLLNINPNK]	LAMP1	P11279	247	262	J249	[OPNATAEPTPPDR]	MRC2	Q9UBG0	362	374	K362	Hex(5)HexNAc(4)Fuc(1)Sia(1)	Known Interaction	P11279-Q9UBG0
295	150	[JATVVWmODNIR]	CD166	Q13740	361	372	J361	[LRSGEPQTFTLOFO]	ITB1	P05556	123	136	K134	Hex(5)HexNAc(4)Fuc(2)Sia(1)	Known Interaction	Q13740-P05556
290	94	[JITIVTGAPRHR]	ITA3	P26006	265	276	J265	[NOPARWHOAO]	UBR4	Q5T4S7	3607	3616	K3614	Hex(5)HexNAc(4)Fuc(1)Sia(1)	Known Interaction	P26006-Q5T4S7
283	100	[JITIVTGAPRHR]	ITA3	P26006	265	276	J265	[ALFLETEQLOO]	CD166	Q13740	143	153	K152	Hex(5)HexNAc(4)Fuc(1)Sia(1)	Known Interaction	P26006-Q13740
270	83	[LGDBISEDSYPDGJITWYRNGK]	CD166	Q13740	154	175	J167	[ILOSPQEVOPGEO]	ADA17	P78536	284	296	K292	Hex(5)HexNAc(4)Fuc(1)Sia(1)	Known Interaction	Q13740-P78536
268	105	[HLLEJSTASVSEAER]	ECE1	P42892	162	176	J166	[EAAEALGAAOO]	PPB1	P05187	37	47	K46	Hex(5)HexNAc(4)Fuc(1)Sia(1)	Known Interaction	P42892-P05187
263	95	[NGVJGTGENGRK]	ITB1	P05556	403	414	J406	[VWFIOVRO]	VPP1	Q93050	292	299	K296	Hex(5)HexNAc(4)Fuc(1)Sia(1)	Known Interaction	P05556-Q93050
260	107	[JITIVTGAPRHR]	ITA3	P26006	265	276	J265	[OLJYTLSQGHRVVLR]	AMPN	P15144	126	140	K126	Hex(5)HexNAc(4)Fuc(1)Sia(1)	Known Interaction	P26006-P15144
252	107	[KLJYTLSQGHRVVLR]	AMPN	P15144	126	140	J128	[RAOAVVQLOPR]	PLEC	Q15149	924	934	K926	Hex(5)HexNAc(4)Fuc(1)Sia(1)	Known Interaction	P15144-Q15149
251	144	[JVSRGR]	EGFR	P00533	528	533	J528	[LYWADAOLSVIGSIR]	LRP1	Q07954	4059	4073	K4065	Hex(5)HexNAc(4)Fuc(1)Sia(1)	Known Interaction	P00533-Q07954
241	88	[KLJYTLSQGHR]	AMPN	P15144	126	136	J128	[AOAVVQLOPR]	PLEC	Q15149	925	934	K932	Hex(5)HexNAc(4)Fuc(1)Sia(1)	Known Interaction	P15144-Q15149
230	85	[KLJYTLSQGHRVVLR]	AMPN	P15144	126	140	J128	[TAOELEEEITLRO]	ROCK2	O75116	480	492	K482	Hex(5)HexNAc(4)Fuc(1)Sia(1)	Known Interaction	P15144-O75116
230	84	[VTPABJTSLPAQRWOWVSR]	MRC2	Q9UBG0	64	82	J69	[AEAELLQQQOELAQEQAR]	PLEC	Q15149	2464	2481	K2473	Hex(5)HexNAc(4)Fuc(1)Sia(1)	Known Interaction	Q9UBG0-Q15149
221	189	[JLTVBPDGALFEQO]	AT1B3	P54709	124	137	J124	[WYSLGOVPGJQTSTTLO]	L1CAM	P32004	662	678	K667	Hex(5)HexNAc(4)Fuc(1)Sia(1)	Known Interaction	P54709-P32004
214	87	[VTPABJTSLPAQRWK]	MRC2	Q9UBG0	64	78	J69	[VLHPLEGAVVIIFOO]	CD166	Q13740	176	190	K189	Hex(5)HexNAc(4)Fuc(1)Sia(1)	Known Interaction	Q9UBG0-Q13740
213	177	[IKLDJYSTQELGK]	5NTD	P21589	329	341	J333	[IOLDJYSTQELGO]	5NTD	P21589	329	341	K330	Hex(5)HexNAc(4)Fuc(1)Sia(1)	Known Interaction	P21589-P21589
212	83	[KLJYTLSQGHR]	AMPN	P15144	126	136	J128	[LLAAGOVPQR]	PLEC	Q15149	562	571	K567	Hex(5)HexNAc(4)Fuc(1)Sia(1)	Known Interaction	P15144-Q15149
208	93	[JITIVTGAPR]	ITA3	P26006	265	274	J265	[WRIOLDJYSTQELGO]	5NTD	P21589	327	341	K330	Hex(5)HexNAc(4)Fuc(1)Sia(1)	Known Interaction	P26006-P21589
206	99	[JITIVTGAPRHR]	ITA3	P26006	265	276	J265	[OLTFRGLR]	PLEC	Q15149	4019	4026	K4019	Hex(5)HexNAc(3)Sia(1)	Known Interaction	P26006-Q15149
201	146	[HLLEJSTASVSEAER]	ECE1	P42892	162	176	J166	[GDOJVTmGQSSAR]	AGRE5	P48960	368	380	K370	Hex(5)HexNAc(4)Fuc(1)Sia(1)	Known Interaction	P42892-P48960
196	165	[JATVVWMK]	CD166	Q13740	361	368	J361	[VADSOVGTQFIRGVSGGER]	ABCG2	Q9UNQ0	173	191	K177	Hex(5)HexNAc(4)Fuc(3)Sia(1)	Known Interaction	Q13740-Q9UNQ0
194	169	[VPGJQTSTTLO]	L1CAM	P32004	668	678	J671	[MLIOLLEVLSGERLPOPTO]	SPTB2	Q01082	87	105	K90	Hex(5)HexNAc(4)Fuc(1)Sia(1)	Known Interaction	P32004-Q01082
193	99	[JLTVBPDGALFEQK]	AT1B3	P54709	124	137	J124	[OPQRPONSLFO]	EXOC4	Q96A65	433	443	K433	Hex(5)HexNAc(4)Fuc(1)Sia(1)	Known Interaction	P54709-Q96A65
190	167	[LJYTLSQGHR]	AMPN	P15144	127	136	J128	[BRVPSYDPLOmDEVYO]	5NTD	P21589	479	494	K488	Hex(5)HexNAc(4)Fuc(1)Sia(1)	Known Interaction	P15144-P21589
184	184	[WRIOLDJYSTQELGO]	5NTD	P21589	327	341	J333	[TBSSJLTLTSGSOHO]	CDCP1	Q9H5V8	382	396	K394	Hex(5)HexNAc(4)Fuc(1)Sia(1)	Known Interaction	P21589-Q9H5V8
178	85	[JITIVTGAPRHR]	ITA3	P26006	265	276	J265	[VVOAASGALR]	CTND1	O60716	726	735	K728	Hex(5)HexNAc(4)Fuc(1)Sia(1)	Known Interaction	P26006-O60716
173	115	[AEFJITLIHPK]	AMPN	P15144	231	241	J234	[TLLIOTVETR]	VIME	P08670	441	450	K445	Hex(5)HexNAc(4)Sia(1)	Known Interaction	P15144-P08670
172	140	[TEAGAFEYVPDPTFEJFTGGVO]	PLXB2	O15031	1084	1105	J1099	[HLLEJSTASVSEAEROAQVYYR]	ECE1	P42892	162	183	K177	Hex(5)HexNAc(4)Fuc(1)Sia(1)	Known Interaction	O15031-P42892
167	472	[JITIVTGAPR]	ITA3	P26006	265	274	J265	[LVDADGPLARLOO]	ADA10	O14672	647	659	K658	Hex(5)HexNAc(4)Fuc(1)Sia(1)	Known Interaction	P26006-O14672
164	314	[DPELRTHJLTDLSPHLR]	L1CAM	P32004	972	988	J979	[LQQAQOGTPmOPNTQATPP}	ICAM1	P05362	514	533	K519	Hex(5)HexNAc(4)Fuc(1)Sia(1)	Known Interaction	P32004-P05362
164	109	[JITIVTGAPR]	ITA3	P26006	265	274	J265	[WRIOLDJYSTQELGO]	5NTD	P21589	327	341	K330	Hex(5)HexNAc(4)Fuc(1)Sia(1)	Known Interaction	P26006-P21589
155	141	[NGVJGTGENGRK]	ITB1	P05556	403	414	J406	[HIWSLEISNOPNVSEPEEPOIR]	CBPD	O75976	967	988	K976	Hex(5)HexNAc(4)Fuc(1)Sia(1)	Known Interaction	P05556-O75976
151	88	[VPGJQTSTTLK]	L1CAM	P32004	668	678	J671	[IOLDJYSTQELGO]	5NTD	P21589	329	341	K330	Hex(5)HexNAc(4)Fuc(1)Sia(1)	Known Interaction	P32004-P21589
150	300	[AJTTQPGIVEGGQVLK]	ITAV	P06756	73	88	J74	[HOPLLIDMNOVYR]	PLEC	Q15149	337	349	K338	Hex(5)HexNAc(4)Fuc(1)Sia(1)	Known Interaction	P06756-Q15149
150	107	[JITIVTGAPR]	ITA3	P26006	265	274	J265	[EVGEHLVSIOO]	FLNB	O75369	1970	1980	K1979	Hex(5)HexNAc(3)Sia(1)	Known Interaction	P26006-O75369
149	116	[JVSRGR]	EGFR	P00533	528	533	J528	[LTFLNSFOMO]	VPP1	Q93050	529	538	K536	Hex(5)HexNAc(4)Fuc(1)Sia(1)	Known Interaction	P00533-Q93050
149	80	[THJLTDLSPHLR]	L1CAM	P32004	977	988	J979	[EDLLBGATDGOO]	MPRI	P11717	471	482	K481	Hex(5)HexNAc(4)Fuc(1)Sia(1)	Known Interaction	P32004-P11717
148	350	[VQPFJVTQGK]	LAMP2	P13473	352	361	J356	[YDLGOGAAVIRSR]	AGRIN	O00468	1704	1716	K1708	Hex(5)HexNAc(4)Fuc(1)Sia(1)	Known Interaction	P13473-O00468
147	91	[JITIVTGAPRHR]	ITA3	P26006	265	276	J265	[OSLLATMO]	DESP	P15924	822	829	K822	Hex(5)HexNAc(3)Sia(1)	Known Interaction	P26006-P15924
141	91	[KLGDBISEDSYPDGJITWYRNGK]	CD166	Q13740	153	175	J167	[ELIIEFSOMAR]	EGFR	P00533	963	973	K970	Hex(5)HexNAc(4)Fuc(1)Sia(1)	Known Interaction	Q13740-P00533
139	189	[AJTTQPGIVEGGQVLK]	ITAV	P06756	73	88	J74	[VGOAVTLEBVSAGEPRSSAR]	PGBM	P98160	3126	3145	K3128	Hex(5)HexNAc(4)Fuc(2)Sia(1)	Known Interaction	P06756-P98160
138	166	[JITIVTGAPR]	ITA3	P26006	265	274	J265	[QORDTTHNLPEFIVO]	PLXB2	O15031	1162	1176	K1163	Hex(5)HexNAc(4)Fuc(1)Sia(1)	Known Interaction	P26006-O15031
137	128	[JVSRGR]	EGFR	P00533	528	533	J528	[LTFLNSFOmO]	VPP1	Q93050	529	538	K536	Hex(5)HexNAc(4)Fuc(1)Sia(1)	Known Interaction	P00533-Q93050
136	136	[LLNINPJK]	LAMP1	P11279	255	262	J261	[SLLDASEEAIOO]	VINC	P18206	721	732	K731	Hex(6)HexNAc(5)Fuc(1)Sia(1)	Known Interaction	P11279-P18206
135	120	[KDJTTVTR]	LAMP1	P11279	247	254	J249	[DGOLVSESSDVLPO}	K2C8	P05787	470	484	K472	Hex(5)HexNAc(4)Fuc(1)Sia(1)	Known Interaction	P11279-P05787
134	211	[KDJTTVTR]	LAMP1	P11279	247	254	J249	[LOTISLVIR]	PLEC	Q15149	1225	1233	K1226	Hex(5)HexNAc(4)Fuc(1)Sia(1)	Known Interaction	P11279-Q15149
133	440	[LJYTLSQGHRVVLR]	AMPN	P15144	127	140	J128	[QAQOVATPLPDPMASR]	DSG2	Q14126	916	931	K919	Hex(5)HexNAc(4)Fuc(1)Sia(1)	Known Interaction	P15144-Q14126
133	84	[JITIVTGAPR]	ITA3	P26006	265	274	J265	[VOPEDOO]	MAP1B	P46821	644	650	K645	Hex(5)HexNAc(3)Sia(1)	Known Interaction	P26006-P46821
131	190	[JITIVTGAPRHR]	ITA3	P26006	265	276	J265	[LRETQGIEOLVLINO]	CTND1	O60716	796	810	K804	Hex(5)HexNAc(4)Fuc(1)Sia(1)	Known Interaction	P26006-O60716
131	112	[JITLAYTLEADR]	ITA3	P26006	511	522	J511	[OLJYTLSQGHR]	AMPN	P15144	126	136	K126	Hex(5)HexNAc(4)Fuc(1)Sia(1)	Known Interaction	P26006-P15144
128	87	[VQPFJVTQGK]	LAMP2	P13473	352	361	J356	[IOLDJYSTQELGO]	5NTD	P21589	329	341	K330	Hex(5)HexNAc(4)Fuc(1)Sia(1)	Known Interaction	P13473-P21589
127	151	[JITIVTGAPR]	ITA3	P26006	265	274	J265	[IGLODPTVPAVO]	SYNE2	Q8WXH0	1453	1464	K1456	Hex(5)HexNAc(3)Sia(1)	Known Interaction	P26006-Q8WXH0
126	154	[NGVJGTGENGR]	ITB1	P05556	403	413	J406	[RSLLSmLVEVHOGVHGFVO]	CBPD	O75976	1202	1220	K1213	Hex(5)HexNAc(4)Fuc(1)Sia(1)	Known Interaction	P05556-O75976
124	227	[KDJTTVTRLLNINPNK]	LAMP1	P11279	247	262	J249	[GHQAFDVGQPRDGLOLVR]	MPRI	P11717	239	256	K253	Hex(5)HexNAc(4)Fuc(1)Sia(1)	Known Interaction	P11279-P11717
124	186	[IKLDJYSTQELGK]	5NTD	P21589	329	341	J333	[OAYTVLLYGNGPGYVLO]	PPB1	P05187	408	424	K408	Hex(5)HexNAc(4)Fuc(1)Sia(1)	Known Interaction	P21589-P05187
124	97	[ODJTTVTRLLNINPNO]	LAMP1	P11279	247	262	J249	[EAGJHTSGAGLVQINOSNGO]	MPRD	P20645	80	99	K95	Hex(5)HexNAc(4)Fuc(1)Sia(1)	Known Interaction	P11279-P20645
123	537	[VPGJQTSTTLK]	L1CAM	P32004	668	678	J671	[QEAQRLOELR]	STIM1	Q13586	295	304	K301	Hex(5)HexNAc(4)Fuc(1)Sia(1)	Known Interaction	P32004-Q13586
123	222	[JITIVTGAPR]	ITA3	P26006	265	274	J265	[LAOPLSSLTPLIMAAO]	PAK2	Q13177	502	517	K504	Hex(5)HexNAc(4)Fuc(1)Sia(1)	Known Interaction	P26006-Q13177
122	82	[KDJTTVTR]	LAMP1	P11279	247	254	J249	[LIOPPAPTSOO]	UBR4	Q5T4S7	4023	4033	K4025	Hex(5)HexNAc(4)Fuc(1)Sia(1)	Known Interaction	P11279-Q5T4S7
121	442	[mFLLVGAPKAJTTQPGIVEGGQVLK]	ITAV	P06756	64	88	J74	[TLGDQLSLLLGARTSNISOPGTLER]	MRC2	Q9UBG0	125	149	K143	Hex(5)HexNAc(4)Fuc(1)Sia(1)	Known Interaction	P06756-Q9UBG0
120	86	[THJLTDLSPHLR]	L1CAM	P32004	977	988	J979	[RAOAVVQLOPR]	PLEC	Q15149	924	934	K932	Hex(5)HexNAc(4)Fuc(1)Sia(1)	Known Interaction	P32004-Q15149
119	271	[VQPFJVTQGO]	LAMP2	P13473	352	361	J356	[NALDTONLIO]	ITA2	P17301	318	327	K323	Hex(5)HexNAc(4)Fuc(1)Sia(1)	Known Interaction	P13473-P17301
119	265	[JITIVTGAPRHR]	ITA3	P26006	265	276	J265	[ERLSVYQAmOO]	PLEC	Q15149	4082	4092	K4091	Hex(5)HexNAc(4)Fuc(1)Sia(1)	Known Interaction	P26006-Q15149
119	249	[KDJTTVTRLLNINPNK]	LAMP1	P11279	247	262	J249	[QPSOPEIVSOALFLETEQLO]	CD166	Q13740	133	152	K136	Hex(5)HexNAc(4)Fuc(1)Sia(1)	Known Interaction	P11279-Q13740
118	247	[RJITLAYTLEADR]	ITA3	P26006	510	522	J511	[GLPGLPGPPGPTGAOGLR]	CO4A2	P08572	687	704	K701	Hex(5)HexNAc(4)Fuc(1)Sia(1)	Known Interaction	P26006-P08572
118	185	[VPGJQTSTTLK]	L1CAM	P32004	668	678	J671	[QVNOLIHARGTNLNO]	PLXB2	O15031	1107	1121	K1110	Hex(5)HexNAc(4)Fuc(1)Sia(1)	Known Interaction	P32004-O15031
117	117	[IOLDJYSTQELGO]	5NTD	P21589	329	341	J333	[IOLDJYSTQELGO]	5NTD	P21589	329	341	K330	Hex(5)HexNAc(4)Fuc(1)Sia(1)	Known Interaction	P21589-P21589
116	96	[JVTVO]	CBPD	O75976	855	859	J855	[ANVTOPO]	TFR1	P02786	54	60	K58	Hex(5)HexNAc(4)Fuc(2)Sia(1)	Known Interaction	O75976-P02786
113	113	[JITIVTGAPR]	ITA3	P26006	265	274	J265	[RLTVMSLQESGLOVNQPASFAIR]	FLNB	O75369	2289	2311	K2301	Hex(5)HexNAc(3)Sia(1)	Known Interaction	P26006-O75369
112	82	[JITIVTGAPR]	ITA3	P26006	265	274	J265	[LOTISLVIRGTQGAEEVLR]	PLEC	Q15149	1225	1243	K1226	Hex(5)HexNAc(4)Fuc(1)Sia(1)	Known Interaction	P26006-Q15149
111	273	[JITIVTGAPR]	ITA3	P26006	265	274	J265	[QLLVAOEGAEO]	STIM1	Q13586	372	382	K377	Hex(5)HexNAc(4)Fuc(1)Sia(1)	Known Interaction	P26006-Q13586
110	411	[DPELRTHJLTDLSPHLR]	L1CAM	P32004	972	988	J979	[GLOLTVEEAVRMGIVGPEFO]	PLEC	Q15149	4119	4138	K4121	Hex(5)HexNAc(4)Fuc(1)Sia(1)	Known Interaction	P32004-Q15149
110	272	[KLJYTLSQGHRVVLR]	AMPN	P15144	126	140	J128	[NDSFTTBIELGOSLLARO]	SPTB2	Q01082	1964	1981	K1975	Hex(5)HexNAc(4)Fuc(1)Sia(1)	Known Interaction	P15144-Q01082
110	177	[VTPABJTSLPAQR]	MRC2	Q9UBG0	64	76	J69	[ILOSPQEVOPGEO]	ADA17	P78536	284	296	K292	Hex(5)HexNAc(4)Fuc(1)Sia(1)	Known Interaction	Q9UBG0-P78536
109	107	[JITIVTGAPR]	ITA3	P26006	265	274	J265	[DGLLVFFFLIVPLIVBAIFIFIOR]	ADAM9	Q13443	697	720	K719	Hex(5)HexNAc(3)Sia(1)	Known Interaction	P26006-Q13443
109	103	[DBVSBRJVSR]	EGFR	P00533	522	531	J528	[OPQRPONSLFO]	EXOC4	Q96A65	433	443	K438	Hex(5)HexNAc(4)Fuc(1)Sia(1)	Known Interaction	P00533-Q96A65
109	89	[JITIVTGAPR]	ITA3	P26006	265	274	J265	[GVLPROLNFQVELLLDO]	ITAV	P06756	515	531	K520	Hex(5)HexNAc(4)Fuc(1)Sia(1)	Known Interaction	P26006-P06756
109	87	[DPELRTHJLTDLSPHLR]	L1CAM	P32004	972	988	J979	[OQDHTIVDTVLMAPRSAOPALLO]	ITB4	P16144	878	900	K895	Hex(5)HexNAc(4)Fuc(1)Sia(1)	Known Interaction	P32004-P16144
108	175	[RJITLAYTLEADR]	ITA3	P26006	510	522	J511	[GLVDOImVDRINLAQO]	PLEC	Q15149	4476	4491	K4480	Hex(5)HexNAc(4)Fuc(1)Sia(1)	Known Interaction	P26006-Q15149
108	94	[JATVVWMO]	CD166	Q13740	361	368	J361	[QLDPGGGQGPPPVTLAAAOO]	ITA3	P26006	876	895	K894	Hex(5)HexNAc(4)Fuc(2)Sia(1)	Known Interaction	Q13740-P26006
107	187	[JITIVTGAPR]	ITA3	P26006	265	274	J265	[FQIQDISVETEDNOEO]	SPTB2	Q01082	157	172	K170	Hex(5)HexNAc(4)Fuc(1)Sia(1)	Known Interaction	P26006-Q01082
107	114	[JVSRGR]	EGFR	P00533	528	533	J528	[NLDTVOGSSLHVGSDLLO]	PLXB2	O15031	691	708	K696	Hex(5)HexNAc(4)Fuc(1)Sia(1)	Known Interaction	P00533-O15031
106	226	[VPGJQTSTTLK]	L1CAM	P32004	668	678	J671	[AQAEREAOELQQR]	PLEC	Q15149	1521	1533	K1528	Hex(5)HexNAc(4)Fuc(1)Sia(1)	Known Interaction	P32004-Q15149
106	66	[NOJVTJRSOGTAEO]	ITB1	P05556	92	105	J97	[LRYQKPEEYDQLVWmAIGHQGDHWKEGR]	NRP1	O14786	740	767	K25	Hex(5)HexNAc(4)Fuc(1)Sia(1)	Known Interaction	O14786-P05556
104	421	[MFLLVGAPKAJTTQPGIVEGGQVLK]	ITAV	P06756	64	88	J74	[RLGANSGLHIIIFDEIDAIBOQR]	NSF	P46459	315	337	K335	Hex(5)HexNAc(4)Fuc(1)Sia(1)	Known Interaction	P06756-P46459
104	299	[JITIVTGAPRHR]	ITA3	P26006	265	276	J265	[VOATNSMIDROPR]	L1CAM	P32004	229	241	K230	Hex(5)HexNAc(4)Fuc(1)Sia(1)	Known Interaction	P26006-P32004
104	214	[EAGJHTSGAGLVQINK]	MPRD	P20645	80	95	J83	[VRALEAANGELEVOIR]	K1C19	P08727	98	113	K111	Hex(5)HexNAc(4)Fuc(1)Sia(1)	Known Interaction	P20645-P08727
103	398	[KLJYTLSQGHRVVLR]	AMPN	P15144	126	140	J128	[QEOALSAIADLLTNEHERVVO]	CTND1	O60716	708	728	K710	Hex(5)HexNAc(4)Fuc(1)Sia(1)	Known Interaction	P15144-O60716
103	267	[JITLAYTLEADRDR]	ITA3	P26006	511	524	J511	[TMASQGGPOYTLSQQPWAQPAO]	COG3	Q96JB2	724	745	K732	Hex(5)HexNAc(4)Fuc(1)Sia(1)	Known Interaction	P26006-Q96JB2
103	199	[DJTTVTR]	LAMP1	P11279	248	254	J249	[LSALQOAQVALMTLTLFPVR]	PCAT1	Q8NF37	38	57	K43	Hex(5)HexNAc(4)Fuc(1)Sia(1)	Known Interaction	P11279-Q8NF37
103	164	[JITIVTGAPR]	ITA3	P26006	265	274	J265	[SIAAATSALVOAASAAQR]	TLN1	Q9Y490	2351	2368	K2361	Hex(5)HexNAc(3)Sia(1)	Known Interaction	P26006-Q9Y490
103	6	[AJTTQPGIVEGGQVLKBDWSSTRR]	ITAV	P06756	73	96	J74	[EBELDPBBEGSTBKLK]	ADAM9	Q13443	435	450	K448	Hex(6)HexNAc(3)Sia(1)	Known Interaction	P06756-Q13443
102	280	[EAGJHTSGAGLVQINKSNGK]	MPRD	P20645	80	99	J83	[ERmIIIIIEIIEOTEIIR]	PLEC	Q15149	3753	3770	K3765	Hex(5)HexNAc(4)Fuc(1)Sia(1)	Known Interaction	P20645-Q15149
102	183	[LLNINPJK]	LAMP1	P11279	255	262	J261	[AGOPHLVLGLLWQIIO]	PLST	P13797	221	236	K223	Hex(6)HexNAc(5)Fuc(1)Sia(1)	Known Interaction	P11279-P13797
102	116	[RJITLAYTLEADR]	ITA3	P26006	510	522	J511	[ODJTTVTR]	LAMP1	P11279	247	254	K247	Hex(5)HexNAc(4)Fuc(1)Sia(1)	Known Interaction	P26006-P11279
102	104	[THJLTDLSPHLRYR]	L1CAM	P32004	977	990	J979	[AVOGFRNVIIGPA}	TGM2	P21980	675	688	K677	Hex(5)HexNAc(4)Fuc(1)Sia(1)	Known Interaction	P32004-P21980
101	109	[JITIVTGAPRHR]	ITA3	P26006	265	276	J265	[OPIEDPANDTVDFPORTSPAR]	CTND1	O60716	634	654	K634	Hex(5)HexNAc(4)Fuc(1)Sia(1)	Known Interaction	P26006-O60716
101	29	[JITIVTGAPRHRHMGAVFLLSQEAGGDLRR]	ITA3	P26006	265	294	J265	[KSVQYDDVPEYKDR]	CD166	Q13740	76	89	K87	Hex(5)HexNAc(4)Fuc(1)Sia(1)	Known Interaction	P26006-Q13740
100	179	[JITIVTGAPR]	ITA3	P26006	265	274	J265	[TmELLTQNWDLSOO]	ASPM	Q8IZT6	981	994	K993	Hex(5)HexNAc(3)Sia(1)	Known Interaction	P26006-Q8IZT6
99	163	[VQPFJVTQGK]	LAMP2	P13473	352	361	J356	[VOATNSmIDROPR]	L1CAM	P32004	229	241	K239	Hex(5)HexNAc(4)Fuc(1)Sia(1)	Known Interaction	P13473-P32004
99	115	[JVTMGQSSAR]	AGRE5	P48960	371	380	J371	[AOVTLNGVPAQPLGPR]	ICAM1	P05362	338	353	K339	Hex(5)HexNAc(4)Fuc(1)Sia(1)	Known Interaction	P48960-P05362
99	101	[NGVJGTGENGRK]	ITB1	P05556	403	414	J406	[VQOSLAAEEEAARQR]	PLEC	Q15149	2127	2141	K2129	Hex(5)HexNAc(4)Fuc(1)Sia(1)	Known Interaction	P05556-Q15149
98	203	[JITIVTGAPRHR]	ITA3	P26006	265	276	J265	[TVIIEQSWGSPOVTO]	CH60	P10809	61	75	K72	Hex(5)HexNAc(4)Fuc(1)Sia(1)	Known Interaction	P26006-P10809
97	224	[LJYTLSQGHR]	AMPN	P15144	127	136	J128	[NISROPGNVLO]	NRP1	O14786	842	852	K846	Hex(5)HexNAc(4)Fuc(1)Sia(1)	Known Interaction	P15144-O14786
97	165	[JITIVTGAPRHR]	ITA3	P26006	265	276	J265	[TQIDGQLFLIOHLLILR]	COG3	Q96JB2	604	620	K614	Hex(5)HexNAc(4)Fuc(1)Sia(1)	Known Interaction	P26006-Q96JB2
97	88	[JVSRGR]	EGFR	P00533	528	533	J528	[SEOEVRAAALVLQTIWGYO]	CTND1	O60716	815	833	K817	Hex(5)HexNAc(4)Fuc(1)Sia(1)	Known Interaction	P00533-O60716
96	311	[mFLLVGAPKAJTTQPGIVEGGQVLK]	ITAV	P06756	64	88	J74	[GYELLFQPEVVRIYISLLOESO]	CTND1	O60716	655	676	K673	Hex(5)HexNAc(4)Fuc(1)Sia(1)	Known Interaction	P06756-O60716
96	175	[ODJTTVTR]	LAMP1	P11279	247	254	J249	[LLNSSOARLR]	PLEC	Q15149	741	750	K746	Hex(5)HexNAc(4)Fuc(1)Sia(1)	Known Interaction	P11279-Q15149
96	121	[LJYTLSQGHR]	AMPN	P15144	127	136	J128	[IOTNITLVBOPGDLESAPVLR]	MPRI	P11717	578	598	K579	Hex(5)HexNAc(4)Fuc(1)Sia(1)	Known Interaction	P15144-P11717
95	130	[JITIVTGAPRHR]	ITA3	P26006	265	276	J265	[ITDFGLAOLLGAEEO]	EGFR	P00533	853	867	K860	Hex(5)HexNAc(4)Fuc(1)Sia(1)	Known Interaction	P26006-P00533
95	111	[JVSRGR]	EGFR	P00533	528	533	J528	[IGQTSSSVSFOSENFR]	ITA2	P17301	1028	1043	K1038	Hex(5)HexNAc(4)Fuc(1)Sia(1)	Known Interaction	P00533-P17301
95	6	[GQLSFNLRDPELRTHJLTDLSPHLR]	L1CAM	P32004	964	988	J979	[MKALAVEGKR]	SPTN2	O15020	283	292	K291	Hex(5)HexNAc(4)Fuc(1)Sia(1)	Known Interaction	P32004-O15020
94	207	[JITIVTGAPR]	ITA3	P26006	265	274	J265	[OQFQLRALMQO]	TS101	Q99816	369	379	K369	Hex(5)HexNAc(4)Fuc(1)Sia(1)	Known Interaction	P26006-Q99816
94	138	[JVSRGR]	EGFR	P00533	528	533	J528	[VONWVO]	RAB21	Q9UL25	110	115	K111	Hex(5)HexNAc(4)Fuc(1)Sia(1)	Known Interaction	P00533-Q9UL25
94	134	[OLJYTLSQGHR]	AMPN	P15144	126	136	J128	[VVOAASGALRNLAVDAR]	CTND1	O60716	726	742	K728	Hex(5)HexNAc(4)Fuc(1)Sia(1)	Known Interaction	P15144-O60716
94	101	[JITIVTGAPR]	ITA3	P26006	265	274	J265	[ITVPLVSEVQIAQLRFPVPOGVLR]	ESYT2	A0FGR8	365	388	K384	Hex(5)HexNAc(3)Sia(1)	Known Interaction	P26006-A0FGR8
94	81	[LDJYSTQELGK]	5NTD	P21589	331	341	J333	[IFOOPLOO}	STIM1	Q13586	678	686	K684	Hex(5)HexNAc(4)Fuc(1)Sia(1)	Known Interaction	P21589-Q13586
93	106	[VPGJQTSTTLK]	L1CAM	P32004	668	678	J671	[TSPLDLOLGHNNWLR]	UBR4	Q5T4S7	4116	4130	K4122	Hex(5)HexNAc(4)Fuc(1)Sia(1)	Known Interaction	P32004-Q5T4S7
93	89	[NGVJGTGENGR]	ITB1	P05556	403	413	J406	[VELAPLPSWQPVGONLTLR]	ICAM1	P05362	116	134	K129	Hex(5)HexNAc(4)Fuc(1)Sia(1)	Known Interaction	P05556-P05362
91	110	[LJYTLSQGHR]	AMPN	P15144	127	136	J128	[LROQALQDTLALYO]	SPTB2	Q01082	840	853	K842	Hex(5)HexNAc(4)Fuc(1)Sia(1)	Known Interaction	P15144-Q01082
91	109	[JITIVTGAPR]	ITA3	P26006	265	274	J265	[TTVODLSELGSVR]	PLEC	Q15149	3473	3485	K3476	Hex(5)HexNAc(3)Sia(1)	Known Interaction	P26006-Q15149
90	232	[IJATDADEPNTLNSK]	DSG2	Q14126	181	195	J182	[VIOILITIVEEVETLR]	PLEC	Q15149	3421	3436	K3423	Hex(5)HexNAc(4)Fuc(1)Sia(1)	Known Interaction	Q14126-Q15149
90	224	[IKLDJYSTQELGK]	5NTD	P21589	329	341	J333	[VLHPLEGAVVIIFOO]	CD166	Q13740	176	190	K189	Hex(5)HexNAc(4)Fuc(1)Sia(1)	Known Interaction	P21589-Q13740
90	185	[VPGJQTSTTLK]	L1CAM	P32004	668	678	J671	[EVGEHLVSIOO]	FLNB	O75369	1970	1980	K1979	Hex(5)HexNAc(4)Fuc(1)Sia(1)	Known Interaction	P32004-O75369
89	377	[NGVJGTGENGRK]	ITB1	P05556	403	414	J406	[EWGOLHVAILER]	PLEC	Q15149	506	517	K509	Hex(5)HexNAc(4)Fuc(1)Sia(1)	Known Interaction	P05556-Q15149
89	315	[AJTTQPGIVEGGQVLK]	ITAV	P06756	73	88	J74	[ELALVORLOPLFNO]	MPRD	P20645	45	58	K53	Hex(5)HexNAc(4)Fuc(1)Sia(1)	Known Interaction	P06756-P20645
88	167	[QLSBVANQJGSQADBELGNPFO]	ITA6	P23229	762	783	J770	[GLHTFARDLGEOmALEVVFLAR]	AGRIN	O00468	1650	1671	K1661	Hex(5)HexNAc(4)Fuc(1)Sia(1)	Known Interaction	P23229-O00468
88	138	[GKDLDTDFTNJASQPETK]	CBPD	O75976	1060	1077	J1070	[QGRHLLTVLLOLFSYBVO]	UBR4	Q5T4S7	4500	4517	K4510	Hex(5)HexNAc(4)Fuc(1)Sia(1)	Known Interaction	O75976-Q5T4S7
88	132	[JITLAYTLEADR]	ITA3	P26006	511	522	J511	[MLIOLLEVLSGERLPOPTO]	SPTB2	Q01082	87	105	K90	Hex(5)HexNAc(4)Fuc(1)Sia(1)	Known Interaction	P26006-Q01082
87	235	[JITIVTGAPR]	ITA3	P26006	265	274	J265	[TPHVQAVQGPLGSPPOR]	PLEC	Q15149	113	129	K128	Hex(5)HexNAc(4)Fuc(1)Sia(1)	Known Interaction	P26006-Q15149
87	162	[JITIVTGAPRHR]	ITA3	P26006	265	276	J265	[SLIQFMOQVHQGVR]	CBPD	O75976	784	797	K790	Hex(5)HexNAc(4)Fuc(1)Sia(1)	Known Interaction	P26006-O75976
87	82	[JITIVTGAPR]	ITA3	P26006	265	274	J265	[EIOESLmVLNSSEGO]	SYNE2	Q8WXH0	2059	2073	K2061	Hex(5)HexNAc(3)Sia(1)	Known Interaction	P26006-Q8WXH0
86	247	[JITIVTGAPR]	ITA3	P26006	265	274	J265	[RAOAVVQLOPR]	PLEC	Q15149	924	934	K932	Hex(5)HexNAc(4)Fuc(1)Sia(1)	Known Interaction	P26006-Q15149
86	204	[JITLAYTLEADR]	ITA3	P26006	511	522	J511	[ELROPLEOEGWO]	CTND1	O60716	834	845	K837	Hex(5)HexNAc(4)Fuc(1)Sia(1)	Known Interaction	P26006-O60716
86	192	[JVSRGR]	EGFR	P00533	528	533	J528	[DVROLLLSINVTNTR]	ITA3	P26006	647	661	K650	Hex(5)HexNAc(4)Fuc(1)Sia(1)	Known Interaction	P00533-P26006
86	169	[JITIVTGAPRHR]	ITA3	P26006	265	276	J265	[IEELRAOPLMELIER]	ECE1	P42892	191	205	K197	Hex(5)HexNAc(4)Fuc(1)Sia(1)	Known Interaction	P26006-P42892
86	63	[YFFJVSDEAALLEK]	ITA2	P17301	340	353	J343	[TGOHDVQVLTAOPR]	CSPG4	Q6UVK1	2252	2265	K2263	Hex(5)HexNAc(4)Sia(1)	Known Interaction	P17301-Q6UVK1
85	324	[KLJYTLSQGHRVVLR]	AMPN	P15144	126	140	J128	[QIDRGVTHLNISGLOmPR]	LRP1	Q07954	3944	3961	K3958	Hex(5)HexNAc(4)Fuc(1)Sia(1)	Known Interaction	P15144-Q07954
85	142	[QJTSQK]	TACD2	P09758	207	212	J208	[LLPOHPHLVR]	DSG2	Q14126	37	46	K40	Hex(5)HexNAc(4)Fuc(1)Sia(1)	Known Interaction	P09758-Q14126
85	137	[ODJTTVTR]	LAMP1	P11279	247	254	J249	[ILOSPQEVOPGEO]	ADA17	P78536	284	296	K286	Hex(5)HexNAc(4)Fuc(1)Sia(1)	Known Interaction	P11279-P78536
85	114	[LDJYSTQELGK]	5NTD	P21589	331	341	J333	[IVRGIIIQGGOHR]	NRP1	O14786	494	506	K504	Hex(5)HexNAc(4)Fuc(1)Sia(1)	Known Interaction	P21589-O14786
85	80	[KDJTTVTR]	LAMP1	P11279	247	254	J249	[SLOEISDGDVIISGNO]	EGFR	P00533	452	467	K454	Hex(5)HexNAc(4)Fuc(1)Sia(1)	Known Interaction	P11279-P00533
84	327	[VTPABJTSLPAQRWKWVSR]	MRC2	Q9UBG0	64	82	J69	[mDEVYOVILPNFLANGGDGFQMIO]	5NTD	P21589	489	512	K494	Hex(5)HexNAc(4)Fuc(1)Sia(1)	Known Interaction	Q9UBG0-P21589
83	243	[KDJTTVTRLLNINPNK]	LAMP1	P11279	247	262	J249	[LFDANOAELFTQSBADLDO]	SPTB2	Q01082	1376	1394	K1381	Hex(5)HexNAc(4)Fuc(1)Sia(1)	Known Interaction	P11279-Q01082
83	175	[VQPFJVTQGK]	LAMP2	P13473	352	361	J356	[ITLVNONAQIILO]	ITA2	P17301	666	678	K671	Hex(5)HexNAc(4)Fuc(1)Sia(1)	Known Interaction	P13473-P17301
83	153	[KLJYTLSQGHR]	AMPN	P15144	126	136	J128	[ELIIEFSOMAR]	EGFR	P00533	963	973	K970	Hex(5)HexNAc(4)Fuc(1)Sia(1)	Known Interaction	P15144-P00533
83	150	[JITIVTGAPR]	ITA3	P26006	265	274	J265	[IDAMDVHVOAGR]	LRP1	Q07954	3902	3913	K3910	Hex(5)HexNAc(4)Fuc(1)Sia(1)	Known Interaction	P26006-Q07954
83	100	[KDJTTVTR]	LAMP1	P11279	247	254	J249	[WLLLGTVTVGFLAQSVLAGVOO]	CO4A2	P08572	16	37	K36	Hex(5)HexNAc(4)Fuc(1)Sia(1)	Known Interaction	P11279-P08572
83	87	[JVTMGQSSARMO]	AGRE5	P48960	371	382	J371	[SERPPIFEIRMYDAQQQQVGTNOBR]	LRP1	Q07954	784	808	K806	Hex(5)HexNAc(4)Fuc(1)Sia(1)	Known Interaction	P48960-Q07954
83	15	[RJITLAYTLEADRDR]	ITA3	P26006	510	524	J511	[SBVQBQAWGTGEKKGR]	ITB4	P16144	631	646	K644	Hex(5)HexNAc(4)Fuc(1)Sia(1)	Known Interaction	P16144-P26006
82	144	[JITIVTGAPR]	ITA3	P26006	265	274	J265	[REPQGFHOVAGLLTQO]	MPRI	P11717	1286	1301	K1293	Hex(5)HexNAc(4)Fuc(1)Sia(1)	Known Interaction	P26006-P11717
82	142	[KLJYTLSQGHR]	AMPN	P15144	126	136	J128	[GNLEVLLFTIQSOMR]	SPTB2	Q01082	360	374	K372	Hex(5)HexNAc(4)Fuc(1)Sia(1)	Known Interaction	P15144-Q01082
82	129	[VQPFJVTQGK]	LAMP2	P13473	352	361	J356	[ELLQHPFLOLAOPLSSLTPLImAAO]	PAK2	Q13177	493	517	K501	Hex(5)HexNAc(4)Fuc(1)Sia(1)	Known Interaction	P13473-Q13177
82	97	[JVTmGQSSAR]	AGRE5	P48960	371	380	J371	[OFLSRPALPFILRLLR]	UBR4	Q5T4S7	4712	4727	K4712	Hex(5)HexNAc(4)Fuc(1)Sia(1)	Known Interaction	P48960-Q5T4S7
81	101	[JITIVTGAPR]	ITA3	P26006	265	274	J265	[YOPTPIPIOVO]	DSG2	Q14126	368	378	K369	Hex(5)HexNAc(4)Fuc(1)Sia(1)	Known Interaction	P26006-Q14126
81	99	[LJYTLSQGHR]	AMPN	P15144	127	136	J128	[LRENELTYYBBOO]	CD59	P13987	79	91	K90	Hex(5)HexNAc(4)Fuc(1)Sia(1)	Known Interaction	P15144-P13987
81	86	[KDJTTVTR]	LAMP1	P11279	247	254	J249	[STEEFPPLQPILQQOO]	ITA4	P13612	592	607	K606	Hex(5)HexNAc(4)Fuc(1)Sia(1)	Known Interaction	P11279-P13612
81	85	[JITIVTGAPRHR]	ITA3	P26006	265	276	J265	[LTVDEAVROGLVGPELHDR]	PLEC	Q15149	3879	3897	K3887	Hex(5)HexNAc(3)Sia(1)	Known Interaction	P26006-Q15149
80	167	[JITIVTGAPR]	ITA3	P26006	265	274	J265	[VBGYLOVDNEELLPO]	ADA17	P78536	183	197	K188	Hex(5)HexNAc(4)Fuc(1)Sia(1)	Known Interaction	P26006-P78536
80	132	[JVTMGQSSARmK]	AGRE5	P48960	371	382	J371	[REAPRPYSOQVSYVIQAEGO]	ADAM9	Q13443	56	75	K64	Hex(5)HexNAc(4)Fuc(1)Sia(1)	Known Interaction	P48960-Q13443
80	116	[THJLTDLSPHLR]	L1CAM	P32004	977	988	J979	[LVGTVLNGYLBLROLVVQR]	UBR4	Q5T4S7	4262	4280	K4275	Hex(5)HexNAc(4)Fuc(1)Sia(1)	Known Interaction	P32004-Q5T4S7
80	107	[JITIVTGAPRHR]	ITA3	P26006	265	276	J265	[IOEIILLOPEGDARIETImO]	SYNE2	Q8WXH0	2083	2102	K2084	Hex(5)HexNAc(3)Sia(1)	Known Interaction	P26006-Q8WXH0
80	104	[JITIVTGAPR]	ITA3	P26006	265	274	J265	[GVLPROLNFQVELLLDO]	ITAV	P06756	515	531	K520	Hex(5)HexNAc(4)Fuc(1)Sia(1)	Known Interaction	P26006-P06756
80	86	[JVSRGR]	EGFR	P00533	528	533	J528	[RGSAOELLQHPFLO]	PAK2	Q13177	488	501	K492	Hex(5)HexNAc(4)Fuc(1)Sia(1)	Known Interaction	P00533-Q13177
79	3	[AABAVOPQEVQmVJGTITNPINGO]	MPRI	P11717	2123	2146	J2136	[EGIKYR]	AP2M1	Q96CW1	164	169	K167	Hex(5)HexNAc(4)Fuc(1)Sia(1)	Known Interaction	P11717-Q96CW1
79	2	[KDFEDLYTPVJGSIVIVRAGKITFAEK]	TFR1	P02786	241	267	J251	[TGKPISK]	CBPD	O75976	1223	1229	K1225	Hex(5)HexNAc(4)Fuc(3)Sia(1)	Known Interaction	P02786-O75976
74	13	[QIGDALPVSBTISASRJATVVWMK]	CD166	Q13740	345	368	J361	[LGFFKRKYEKMTK]	ITA2	P17301	1156	1168	K1165	Hex(5)HexNAc(4)Fuc(3)Sia(1)	Known Interaction	Q13740-P17301
72	2	[KSFPBFDEPAMKAEFJITLIHPK]	AMPN	P15144	219	241	J234	[mTKNPDEIDETTELSS}	ITA2	P17301	1166	1182	K1168	Hex(5)HexNAc(4)Sia(1)	Known Interaction	P15144-P17301
67	8	[LNLQTSTSIPJVTEMKTNMSLGLILTR]	ITA2	P17301	95	121	J105	[ALKMPYR]	ITA5	P08648	963	969	K965	Hex(5)HexNAc(4)Fuc(3)Sia(1)	Known Interaction	P17301-P08648
65	8	[DNQWLGVTLSRQPGEJGSIVTBGHRWO]	ITA4	P13612	123	149	J138	[ELKDTGKDAVNBTYKNEDDBVVR]	ITB3	P05106	670	692	K684	Hex(5)HexNAc(4)Fuc(1)Sia(1)	Known Interaction	P13612-P05106
64	29	[EGIBNGFTALBPASDPOPJFTDBNR]	ADA10	O14672	533	557	J551	[YDEDHSGDDKVFLDBFBK]	UBR4	Q5T4S7	4647	4664	K4656	Hex(5)HexNAc(4)Fuc(3)Sia(1)	Known Interaction	O14672-Q5T4S7
64	22	[GEKKDTBTQEBSYFJITKVESR]	ITB1	P05556	655	676	J669	[QPKBRBQPRYTGDK]	LRP1	Q07954	4217	4230	K4219	Hex(5)HexNAc(4)Fuc(1)Sia(1)	Known Interaction	P05556-Q07954
64	4	[EBVQBRAFNKGEKKDTBTQEBSYFJITK]	ITB1	P05556	645	672	J669	[SEKAASFK]	ADA17	P78536	803	810	K805	Hex(5)HexNAc(4)Sia(2)	Known Interaction	P05556-P78536
63	129	[LJYTLSQGHR]	AMPN	P15144	127	136	J128	[GALQNIIPASTGAAOAVGO]	G3P	P04406	201	219	K215	Hex(5)HexNAc(4)Sia(1)	Known Interaction	P15144-P04406
59	50	[VPGJQTSTTLK]	L1CAM	P32004	668	678	J671	[FKRAEDYPIDLYYLMDLSYSmK]	ITB1	P05556	135	156	K136	Hex(5)HexNAc(4)Fuc(1)Sia(1)	Known Interaction	P05556-P32004
58	88	[LDJYSTQELGKTIVYLDGSSQSBRFR]	5NTD	P21589	331	356	J333	[KLEENNHKTEA}	CD166	Q13740	573	584	K580	Hex(5)HexNAc(4)Fuc(2)Sia(1)	Known Interaction	P21589-Q13740
58	5	[EQTVSVSGAFQINTFDLRVQPFJVTQGO]	LAMP2	P13473	334	361	J356	[LSKEDIERmVQEAEK]	HSP7C	P11142	510	524	K512	Hex(5)HexNAc(4)Fuc(2)Sia(1)	Known Interaction	P13473-P11142
57	26	[EATDVIIIHSKKLJYTLSQGHRVVLR]	AMPN	P15144	115	140	J128	[IGFGSFVEKTVMPYISTTPAK]	ITB1	P05556	182	202	K190	Hex(5)HexNAc(4)Fuc(1)Sia(1)	Known Interaction	P15144-P05556
57	12	[GSODIOONOJVTJR]	ITB1	P05556	85	98	J94	[AEKENPGLTQDIIMKILEKK]	PDC10	Q9BUL8	51	70	K65	Hex(5)HexNAc(4)Fuc(1)Sia(1)	Known Interaction	Q9BUL8-P05556
57	3	[ODJTTVTRLLNINPJO]	LAMP1	P11279	247	262	J249	[KFLENLLEK]	DJC13	O75165	506	514	K506	Hex(6)HexNAc(5)Fuc(1)Sia(1)	Known Interaction	P11279-O75165
53	4	[VBREAGJHTSGAGLVQINKSNGKETVVGR]	MPRD	P20645	77	105	J83	[LTVSNVLKEIK]	TFR1	P02786	375	385	K382	Hex(5)HexNAc(4)Fuc(3)Sia(1)	Known Interaction	P20645-P02786
52	40	[VPGJQTSTTLO]	L1CAM	P32004	668	678	J671	[KAAQNSGEAEYIEK]	LAMB1	P07942	1661	1674	K1661	Hex(5)HexNAc(4)Fuc(1)Sia(1)	Known Interaction	P07942-P32004
52	20	[DIOONOJVTJR]	ITB1	P05556	88	98	J97	[WKNHGBQR]	TGM2	P21980	264	271	K265	Hex(5)HexNAc(4)Fuc(1)Sia(1)	Known Interaction	P05556-P21980
52	4	[mFLLVGAPKAJTTQPGIVEGGQVLK]	ITAV	P06756	64	88	J74	[AAFVSEQQQKLSR]	ITA3	P26006	629	641	K638	Hex(5)HexNAc(4)Fuc(1)Sia(1)	Known Interaction	P06756-P26006
50	3	[AFNKGEKKDTBTQEBSYFJITKVESRDK]	ITB1	P05556	651	678	J669	[KYEKMTK]	ITA2	P17301	1162	1168	K1162	Hex(5)HexNAc(4)Sia(2)	Known Interaction	P05556-P17301
49	34	[VQPFJVTQGO]	LAMP2	P13473	352	361	J356	[TQKDSPSKSGSEAQTTKDVPNK]	TGON2	O43493	160	181	K176	Hex(5)HexNAc(4)Fuc(1)Sia(1)	Known Interaction	O43493-P13473
49	6	[RJITLAYTLEADR]	ITA3	P26006	510	522	J511	[SBVQBQAWGTGEKKGRTBEEBNFK]	ITB4	P16144	631	654	K644	Hex(5)HexNAc(4)Fuc(1)Sia(1)	Known Interaction	P16144-P26006
45	5	[SFPBFDEPAmKAEFJITLIHPK]	AMPN	P15144	220	241	J234	[DDLENVKSLGTDLmNEMR]	ITB1	P05556	157	174	K163	Hex(6)HexNAc(3)Sia(1)	Known Interaction	P15144-P05556
42	22	[DIOONOJVTJR]	ITB1	P05556	88	98	J97	[LGGTLARKR]	PARVB	Q9HBI1	25	33	K32	Hex(5)HexNAc(4)Fuc(1)Sia(1)	Known Interaction	P05556-Q9HBI1
42	9	[GDASLOMDOSDAVSHTGJYTBEVTELTR]	CD47	Q08722	94	121	J111	[KPSGLNGEASK]	CD44	P16070	695	705	K695	Hex(6)HexNAc(5)Fuc(1)Sia(1)	Known Interaction	Q08722-P16070
42	4	[GYNPVTOJVTVO]	CBPD	O75976	848	859	J855	[LVRKDR]	MPRI	P11717	254	259	K257	Hex(5)HexNAc(4)Fuc(2)Sia(1)	Known Interaction	O75976-P11717
41	34	[GSODIOONOJVTJRSO]	ITB1	P05556	85	100	J97	[LLEKLAGBKLNVAEVTQSEIGQKQK]	PARVB	Q9HBI1	124	148	K127	Hex(5)HexNAc(4)Fuc(1)Sia(1)	Known Interaction	Q9HBI1-P05556
41	3	[KLJYTLSQGHR]	AMPN	P15144	126	136	J128	[SKGTAEK]	ITB1	P05556	99	105	K100	Hex(6)HexNAc(3)Sia(1)	Known Interaction	P15144-P05556
40	65	[VTGLJBTTNHPINPO]	ITA5	P08648	864	878	J868	[AFNSTLPTMAQMEKALSIGFETBR]	CD44	P16070	55	78	K68	Hex(5)HexNAc(4)Sia(2)	Known Interaction	P16070-P08648
40	9	[ONOJVTJRSO]	ITB1	P05556	91	100	J97	[ETADFKVYTKGAGSGELKVTVK]	FLNA	P21333	499	520	K516	Hex(5)HexNAc(4)Fuc(1)Sia(1)	Known Interaction	P21333-P05556
40	7	[JITIVTGAPRHR]	ITA3	P26006	265	276	J265	[GSKDIKK]	ITB1	P05556	85	91	K90	Hex(5)HexNAc(4)Fuc(1)Sia(1)	Known Interaction	P26006-P05556
39	10	[NOJVTJR]	ITB1	P05556	92	98	J97	[RKAEAER]	SRC8	Q14247	367	373	K368	Hex(5)HexNAc(4)Fuc(1)Sia(1)	Known Interaction	Q14247-P05556
38	66	[TSIPTINmEJK]	ITA3	P26006	960	970	J969	[KLEENNHKTEA}	CD166	Q13740	573	584	K580	Hex(6)HexNAc(5)Fuc(1)Sia(1)	Known Interaction	Q13740-P26006
37	31	[ADINOWRIOLDJYSTQELGO]	5NTD	P21589	322	341	J333	[EVTVPVFYPTEKVWLEVEPVGmLKEGDR]	MUC18	P43121	240	267	K251	Hex(5)HexNAc(4)Fuc(2)Sia(1)	Known Interaction	P43121-P21589
37	13	[TPOLSHDAJETLPLHLYVOSYGO]	PLXB2	O15031	725	747	J733	[IGYSNNGSDWKMIMDDSKR]	NRP1	O14786	517	535	K527	Hex(5)HexNAc(5)Fuc(1)Sia(1)	Known Interaction	O15031-O14786
37	2	[IKLDJYSTQELGKTIVYLDGSSQSBR]	5NTD	P21589	329	354	J333	[BSNISIGDEVQFEISITSNKBPKK]	ITB1	P05556	415	438	K437	Hex(5)HexNAc(4)Fuc(1)Sia(1)	Known Interaction	P21589-P05556
36	20	[THJLTDLSPHLR]	L1CAM	P32004	977	988	J979	[KGPSTVTDLEDTK]	AP2A2	O94973	619	631	K619	Hex(5)HexNAc(4)Fuc(2)Sia(1)	Known Interaction	P32004-O94973
36	9	[RJITLAYTLEADR]	ITA3	P26006	510	522	J511	[TKFDBVENGWPSVBIDLTLBFSYK]	ITA4	P13612	482	505	K483	Hex(5)HexNAc(4)Fuc(1)Sia(1)	Known Interaction	P13612-P26006
35	13	[ALFLETEQLKKLGDBISEDSYPDGJITWYR]	CD166	Q13740	143	172	J167	[LEYKFBTREGNQDK]	ITA6	P23229	677	690	K680	Hex(5)HexNAc(4)Fuc(1)Sia(1)	Known Interaction	Q13740-P23229
35	12	[JATVVWMKDNIR]	CD166	Q13740	361	372	J361	[ALKMPYRILPRQLPQK]	ITA5	P08648	963	978	K965	Hex(5)HexNAc(4)Fuc(3)Sia(1)	Known Interaction	P08648-Q13740
35	11	[KDJTTVTR]	LAMP1	P11279	247	254	J249	[DVHmKGEYFVNVTTR]	ITA2	P17301	1064	1078	K1068	Hex(5)HexNAc(4)Fuc(1)Sia(1)	Known Interaction	P17301-P11279
35	2	[VPGJQTSTTLKLSPYVHYTFRVTAINK]	L1CAM	P32004	668	694	J671	[QPSKPEIVSKALFLETEQLK]	CD166	Q13740	133	152	K142	Hex(5)HexNAc(4)Fuc(1)Sia(1)	Known Interaction	P32004-Q13740
34	22	[QLVLJLTGNTLBAGGASDEOLISLIBR]	PODXL	O00592	356	382	J360	[LBTMKK]	NHRF1	O14745	154	159	K158	Hex(5)HexNAc(4)Fuc(1)Sia(1)	Known Interaction	O00592-O14745
33	19	[JITLAYTLEADRDRRPPRLR]	ITA3	P26006	511	530	J511	[FEKEKMNAK]	ITB1	P05556	766	774	K770	Hex(5)HexNAc(4)Fuc(2)Sia(1)	Known Interaction	P26006-P05556
33	14	[ONOJVTJR]	ITB1	P05556	91	98	J97	[ASQKVYAMKLLSK]	ROCK2	O75116	113	125	K116	Hex(5)HexNAc(4)Fuc(1)Sia(1)	Known Interaction	O75116-P05556
32	75	[DTBTQEBSYFJITOVESR]	ITB1	P05556	659	676	J669	[RMAKYEKAEIKEMGEMHR]	EPCAM	P16422	293	310	K303	Hex(5)HexNAc(4)Fuc(1)Sia(1)	Known Interaction	P05556-P16422
32	2	[EATDVIIIHSKKLJYTLSQGHR]	AMPN	P15144	115	136	J128	[KAFEHSVHR]	5NTD	P21589	433	441	K433	Hex(5)HexNAc(4)Fuc(1)Sia(1)	Known Interaction	P15144-P21589
31	17	[JITIVTGAPRHRHmGAVFLLSQEAGGDLRR]	ITA3	P26006	265	294	J265	[GSRGDPGPPGPPPVILPGMKDIK]	CO4A2	P08572	968	990	K987	Hex(5)HexNAc(4)Fuc(1)Sia(1)	Known Interaction	P26006-P08572
31	14	[ONOJVTJR]	ITB1	P05556	91	98	J94	[LKPGAPLKPKLNPKK]	FLNB	O75369	242	256	K243	Hex(5)HexNAc(4)Fuc(1)Sia(1)	Known Interaction	O75369-P05556
31	2	[JITIVTGAPR]	ITA3	P26006	265	274	J265	[QRPLKIRMLDGTVK]	TLN1	Q9Y490	85	98	K89	Hex(5)HexNAc(4)Fuc(1)Sia(1)	Known Interaction	Q9Y490-P26006
31	2	[GSODIOONOJVTJRSO]	ITB1	P05556	85	100	J94	[QADSSKR]	UBR4	Q5T4S7	1932	1938	K1937	Hex(5)HexNAc(4)Fuc(1)Sia(1)	Known Interaction	P05556-Q5T4S7
30	17	[VPGJQTSTTLKLSPYVHYTFRVTAINK]	L1CAM	P32004	668	694	J671	[REFAKFEK]	ITB1	P05556	761	768	K765	Hex(5)HexNAc(4)Fuc(1)Sia(1)	Known Interaction	P32004-P05556
30	10	[JATVVWmK]	CD166	Q13740	361	368	J361	[TmQNVKHPVTGQFLYQDSNWASK]	TFR1	P02786	509	531	K514	Hex(5)HexNAc(4)Fuc(3)Sia(1)	Known Interaction	P02786-Q13740
30	6	[DIOONOJVTJR]	ITB1	P05556	88	98	J94	[TQEKEQIK]	K2C8	P05787	89	96	K92	Hex(5)HexNAc(4)Fuc(1)Sia(1)	Known Interaction	P05556-P05787
29	30	[EAGJHTSGAGLVQINKSNGK]	MPRD	P20645	80	99	J83	[YYLQDGDLDVVFASSSKBGKDK]	MPRI	P11717	2215	2236	K2234	Hex(5)HexNAc(4)Fuc(1)Sia(1)	Known Interaction	P11717-P20645
29	28	[RDBVEBLLLHSGOPDJQTBHSLBR]	ITB5	P18084	639	662	J654	[GEKGDRGDAGQKGER]	COIA1	P39060	1325	1339	K1336	Hex(5)HexNAc(4)Fuc(1)Sia(1)	Known Interaction	P18084-P39060
29	23	[VTGLJBTTNHPINPO]	ITA5	P08648	864	878	J868	[MVEAAKGAAAHPDSEEQQQR]	TLN1	Q9Y490	870	889	K875	Hex(5)HexNAc(4)Sia(2)	Known Interaction	Q9Y490-P08648
29	19	[DFEDLYTPVJGSIVIVRAGO]	TFR1	P02786	242	261	J251	[ITDFGLAKLLGAEEK]	EGFR	P00533	853	867	K860	Hex(5)HexNAc(4)Fuc(3)Sia(1)	Known Interaction	P02786-P00533
28	57	[JATVVWmO]	CD166	Q13740	361	368	J361	[SKGGKYSVKDK]	L1CAM	P32004	1146	1156	K1150	Hex(5)HexNAc(4)Fuc(3)Sia(1)	Known Interaction	P32004-Q13740
28	28	[DJTTVTRLLNINPNK]	LAMP1	P11279	248	262	J249	[TGLKELPMR]	EGFR	P00533	130	138	K133	Hex(5)HexNAc(4)Fuc(1)Sia(1)	Known Interaction	P11279-P00533
28	26	[ODTBTQEBSYFJITO]	ITB1	P05556	658	672	J669	[YKPMMIITEYMENGALDKFLR]	EPHA2	P29317	685	705	K702	Hex(5)HexNAc(4)Fuc(1)Sia(1)	Known Interaction	P29317-P05556
28	11	[AFNOGEOODTBTQEBSYFJITO]	ITB1	P05556	651	672	J669	[DPYSGKLISLFQAmK]	PLEC	Q15149	4153	4167	K4158	Hex(5)HexNAc(4)Fuc(1)Sia(1)	Known Interaction	P05556-Q15149
28	9	[ONOJVTJR]	ITB1	P05556	91	98	J97	[EAMKSNR}	PAK2	Q13177	518	525	K521	Hex(5)HexNAc(4)Fuc(1)Sia(1)	Known Interaction	P05556-Q13177
28	9	[ONOJVTJRSO]	ITB1	P05556	91	100	J97	[KKLVIVGDGABGK]	RHOA	P61586	6	18	K7	Hex(5)HexNAc(4)Fuc(1)Sia(1)	Known Interaction	P61586-P05556
28	8	[WRIKLDJYSTQELGKTIVYLDGSSQSBRFR]	5NTD	P21589	327	356	J333	[TELSKR]	ITA4	P13612	174	179	K178	Hex(5)HexNAc(4)Fuc(1)Sia(1)	Known Interaction	P21589-P13612
28	7	[ONOJVTJRSOGTAEO]	ITB1	P05556	91	105	J97	[KRKTATITTR]	UBR4	Q5T4S7	2271	2280	K2273	Hex(5)HexNAc(4)Fuc(1)Sia(1)	Known Interaction	P05556-Q5T4S7
28	5	[ONOJVTJR]	ITB1	P05556	91	98	J97	[VKNWVK]	RAB21	Q9UL25	110	115	K111	Hex(5)HexNAc(4)Fuc(1)Sia(1)	Known Interaction	P05556-Q9UL25
27	12	[JITLAYTLEADR]	ITA3	P26006	511	522	J511	[SLGTKLAEEMR]	ITB5	P18084	159	169	K163	Hex(5)HexNAc(4)Fuc(1)Sia(1)	Known Interaction	P26006-P18084
27	11	[JITIVTGAPRHRHMGAVFLLSQEAGGDLR]	ITA3	P26006	265	293	J265	[KGDSNSYNVR]	EPHA2	P29317	476	485	K476	Hex(5)HexNAc(3)Sia(1)	Known Interaction	P26006-P29317
27	10	[ADINKWRIKLDJYSTQELGK]	5NTD	P21589	322	341	J333	[SAmQTLKGIVRFLSKTDK]	ITA4	P13612	868	885	K882	Hex(5)HexNAc(4)Fuc(1)Sia(1)	Known Interaction	P21589-P13612
27	7	[NGVJGTGENGR]	ITB1	P05556	403	413	J406	[KVBNGIGIGEFK]	EGFR	P00533	335	346	K335	Hex(5)HexNAc(4)Fuc(1)Sia(1)	Known Interaction	P00533-P05556
27	5	[NOJVTJRSO]	ITB1	P05556	92	100	J97	[ENKVFmR]	NRP1	O14786	507	513	K509	Hex(5)HexNAc(4)Fuc(1)Sia(1)	Known Interaction	P05556-O14786
26	20	[KDFEDLYTPVJGSIVIVR]	TFR1	P02786	241	258	J251	[ARKGKSSSAQQK]	MPRI	P11717	2459	2470	K2463	Hex(5)HexNAc(4)Fuc(3)Sia(1)	Known Interaction	P02786-P11717
26	19	[QPGEJGSIVTBGHR]	ITA4	P13612	134	147	J138	[KLJYTLSQGHR]	AMPN	P15144	126	136	K126	Hex(5)HexNAc(4)Fuc(1)Sia(1)	Known Interaction	P13612-P15144
26	16	[JITIVTGAPR]	ITA3	P26006	265	274	J265	[GSRGEKGDPGK]	COIA1	P39060	1099	1109	K1104	Hex(5)HexNAc(4)Fuc(1)Sia(1)	Known Interaction	P39060-P26006
26	14	[ODTBTQEBSYFJITOVESRDO]	ITB1	P05556	658	678	J669	[KDVDEAYMNKVELESR]	K2C8	P05787	198	213	K207	Hex(5)HexNAc(4)Fuc(1)Sia(1)	Known Interaction	P05556-P05787
26	7	[TBNPETFPSSJESR]	CTL2	Q8IWA5	407	420	J417	[KINPTESTSK]	MSPD2	Q8NHP6	293	302	K293	Hex(5)HexNAc(4)Fuc(2)Sia(1)	Known Interaction	Q8IWA5-Q8NHP6
26	4	[JITIVTGAPRHRHMGAVFLLSQEAGGDLR]	ITA3	P26006	265	293	J265	[LQQEAKLLQLK]	PLEC	Q15149	2599	2609	K2604	Hex(5)HexNAc(3)Sia(1)	Known Interaction	P26006-Q15149
26	3	[VBREAGJHTSGAGLVQINKSNGK]	MPRD	P20645	77	99	J83	[LPSLWADNKRSLLSMLVEVHKGVHGFVKDK]	CBPD	O75976	1193	1222	K1201	Hex(5)HexNAc(4)Fuc(1)Sia(1)	Known Interaction	O75976-P20645
25	24	[LDJYSTQELGKTIVYLDGSSQSBRFR]	5NTD	P21589	331	356	J333	[KYEKMTK]	ITA2	P17301	1162	1168	K1165	Hex(5)HexNAc(4)Fuc(1)Sia(1)	Known Interaction	P21589-P17301
25	12	[JITLAYTLEADRDR]	ITA3	P26006	511	524	J511	[TTNPTAKR]	TLN1	Q9Y490	1516	1523	K1522	Hex(5)HexNAc(4)Sia(2)	Known Interaction	P26006-Q9Y490
25	8	[EAGJHTSGAGLVQINKSNGKETVVGR]	MPRD	P20645	80	105	J83	[LQSmKLDYR]	MPRI	P11717	1869	1877	K1873	Hex(5)HexNAc(4)Fuc(1)Sia(1)	Known Interaction	P20645-P11717
25	8	[GPEBSQJYTTPSGVIO]	NRP1	O14786	144	159	J150	[KERELEEARK]	TLN1	Q9Y490	2511	2520	K2511	Hex(5)HexNAc(4)Fuc(1)Sia(1)	Known Interaction	O14786-Q9Y490
25	3	[MFLLVGAPKAJTTQPGIVEGGQVLK]	ITAV	P06756	64	88	J74	[FPILSANIKAK]	5NTD	P21589	137	147	K145	Hex(5)HexNAc(4)Fuc(1)Sia(1)	Known Interaction	P06756-P21589
25	2	[ODTBTQEBSYFJITO]	ITB1	P05556	658	672	J669	[SKEESSGTPAHQmNLR]	FERM2	Q96AC1	409	424	K410	Hex(5)HexNAc(4)Fuc(1)Sia(1)	Known Interaction	P05556-Q96AC1
24	24	[THJLTDLSPHLR]	L1CAM	P32004	977	988	J979	[KTBNSNDGKK]	EPHB2	P29323	1010	1019	K1018	Hex(5)HexNAc(4)Fuc(2)Sia(1)	Known Interaction	P32004-P29323
24	19	[ITASARGYNPVTOJVTVO]	CBPD	O75976	842	859	J855	[KQVVKLK]	DYN2	P50570	415	421	K415	Hex(5)HexNAc(4)Fuc(2)Sia(1)	Known Interaction	O75976-P50570
24	10	[ONOJVTJRSO]	ITB1	P05556	91	100	J94	[DTFWKGTTR]	ILK	Q13418	166	174	K170	Hex(5)HexNAc(4)Fuc(1)Sia(1)	Known Interaction	P05556-Q13418
24	5	[KLJYTLSQGHRVVLRGVGGSQPPDIDK]	AMPN	P15144	126	152	J128	[FPILSANIKAK]	5NTD	P21589	137	147	K145	Hex(5)HexNAc(4)Fuc(1)Sia(1)	Known Interaction	P15144-P21589
24	4	[KDFEDLYTPVJGSIVIVRAGKITFAEK]	TFR1	P02786	241	267	J251	[NGSKNLGK]	MPRI	P11717	543	550	K546	Hex(5)HexNAc(4)Fuc(3)Sia(1)	Known Interaction	P02786-P11717
24	4	[ODTBTQEBSYFJITO]	ITB1	P05556	658	672	J669	[KSNYEVLEK]	FAK1	Q05397	191	199	K191	Hex(5)HexNAc(4)Fuc(3)Sia(1)	Known Interaction	P05556-Q05397
23	21	[KLJYTLSQGHR]	AMPN	P15144	126	136	J128	[DKLPQPVQPDPVSHBKEK]	ITB1	P05556	677	694	K692	Hex(5)HexNAc(4)Fuc(1)Sia(1)	Known Interaction	P05556-P15144
23	20	[QLSBVANQJGSQADBELGNPFKR]	ITA6	P23229	762	784	J770	[KLEENNHKTEA}	CD166	Q13740	573	584	K580	Hex(5)HexNAc(4)Fuc(1)Sia(1)	Known Interaction	P23229-Q13740
23	10	[mFLLVGAPOAJTTQPGIVEGGQVLO]	ITAV	P06756	64	88	J74	[KLLEERTLKQKVENLLLEAEKR]	ROCK2	O75116	739	760	K759	Hex(5)HexNAc(4)Fuc(1)Sia(1)	Known Interaction	O75116-P06756
23	9	[GYYJFQSEAGSHTLQSmYGBDVGPDGR]	HLAB	P01889	107	133	J110	[AAEKQMK]	CALR	P27797	352	358	K355	Hex(5)HexNAc(4)Sia(2)	Known Interaction	P01889-P27797
23	7	[KDJTTVTR]	LAMP1	P11279	247	254	J249	[FISSPMKEK]	MPRI	P11717	551	559	K557	Hex(5)HexNAc(4)Fuc(1)Sia(1)	Known Interaction	P11717-P11279
23	5	[KLJYTLSQGHRVVLR]	AMPN	P15144	126	140	J128	[KIKKYR]	ICAM1	P05362	508	513	K508	Hex(6)HexNAc(3)Sia(1)	Known Interaction	P15144-P05362
23	3	[HNIIPIFAVTJYSYSYYEK]	ITB4	P16144	317	335	J327	[BTDPKFQGQTBEMBQTBLGVBAEHK]	ITB1	P05556	620	644	K624	Hex(5)HexNAc(4)Fuc(1)Sia(1)	Known Interaction	P05556-P16144
23	3	[ONOJVTJR]	ITB1	P05556	91	98	J97	[QADSSKRK]	UBR4	Q5T4S7	1932	1939	K1937	Hex(5)HexNAc(4)Fuc(1)Sia(1)	Known Interaction	P05556-Q5T4S7
23	2	[ONOJVTJR]	ITB1	P05556	91	98	J97	[KLTLTR]	UBR4	Q5T4S7	1939	1944	K1939	Hex(5)HexNAc(4)Fuc(1)Sia(1)	Known Interaction	P05556-Q5T4S7
22	46	[HRPTAGAFJHSDLDAELRR]	TACD2	P09758	160	178	J168	[QBKNVQDAIADAEQRGEHALKDAR]	K22E	P35908	416	439	K418	Hex(5)HexNAc(4)Sia(2)	Known Interaction	P35908-P09758
22	37	[TAVJBSSDFDABLITO]	CD59	P13987	40	55	J43	[KINPTESTSKAEENEKVDSK]	MSPD2	Q8NHP6	293	312	K308	Hex(6)HexNAc(5)Fuc(1)Sia(1)	Known Interaction	Q8NHP6-P13987
22	21	[VPGJQTSTTLKLSPYVHYTFR]	L1CAM	P32004	668	688	J671	[GEKKDTBTQEBSYFJITKVESR]	ITB1	P05556	655	676	K672	Hex(5)HexNAc(4)Fuc(1)Sia(1)	Known Interaction	P05556-P32004
22	19	[TBPAGVmGEJNTLVWO]	EGFR	P00533	594	609	J603	[EDGEKAAREVK]	GNAI2	P04899	25	35	K29	Hex(5)HexNAc(4)Fuc(1)Sia(1)	Known Interaction	P00533-P04899
22	16	[TBPAGVmGEJNTLVWO]	EGFR	P00533	594	609	J603	[KmVSKYKYR]	TS101	Q99816	10	18	K16	Hex(5)HexNAc(4)Fuc(1)Sia(1)	Known Interaction	P00533-Q99816
22	16	[DIOONOJVTJRSO]	ITB1	P05556	88	100	J94	[KQRVSRNR]	ITB5	P18084	236	243	K236	Hex(5)HexNAc(4)Fuc(1)Sia(1)	Known Interaction	P05556-P18084
22	15	[KLJYTLSQGHR]	AMPN	P15144	126	136	J128	[ILKGQKKDKLGPEIPLAmDRFPYVALSK]	PPB1	P05187	76	103	K78	Hex(5)HexNAc(4)Fuc(1)Sia(1)	Known Interaction	P05187-P15144
22	11	[JVTJRSO]	ITB1	P05556	94	100	J97	[LEAmTNSKQSIAK]	VINC	P18206	374	386	K381	Hex(5)HexNAc(4)Fuc(1)Sia(1)	Known Interaction	P18206-P05556
22	10	[DTBTQEBSYFJITK]	ITB1	P05556	659	672	J669	[SNKVBGNSR]	ADA17	P78536	474	482	K476	Hex(5)HexNAc(4)Sia(2)	Known Interaction	P05556-P78536
22	9	[JITLAYTLEADR]	ITA3	P26006	511	522	J511	[ALKISGVIGPYR]	LAMB1	P07942	1206	1217	K1208	Hex(5)HexNAc(4)Fuc(1)Sia(1)	Known Interaction	P26006-P07942
22	8	[THJLTDLSPHLRYRFQLQATTO]	L1CAM	P32004	977	998	J979	[RQLLLDTTDKFR]	SPTN2	O15020	1900	1911	K1909	Hex(5)HexNAc(4)Fuc(1)Sia(1)	Known Interaction	P32004-O15020
22	6	[KLJYTLSQGHR]	AMPN	P15144	126	136	J128	[YHAVRIRKEEREIKDEK]	ITA6	P23229	1093	1109	K1106	Hex(5)HexNAc(4)Fuc(1)Sia(1)	Known Interaction	P23229-P15144
22	6	[KLJYTLSQGHRVVLR]	AMPN	P15144	126	140	J128	[KEEREIKDEKYIDNLEKK]	ITA6	P23229	1100	1117	K1106	Hex(5)HexNAc(4)Fuc(1)Sia(1)	Known Interaction	P23229-P15144
22	4	[WRIKLDJYSTQELGK]	5NTD	P21589	327	341	J333	[FLSKTDKR]	ITA4	P13612	879	886	K885	Hex(5)HexNAc(4)Fuc(1)Sia(1)	Known Interaction	P21589-P13612
22	3	[VTPABJTSLPAQR]	MRC2	Q9UBG0	64	76	J69	[VYLFTIKK]	ITA2	P17301	527	534	K533	Hex(5)HexNAc(4)Fuc(3)Sia(1)	Known Interaction	Q9UBG0-P17301
22	3	[KLGDBISEDSYPDGJITWYR]	CD166	Q13740	153	172	J167	[LGFFKRKYEKMTK]	ITA2	P17301	1156	1168	K1165	Hex(5)HexNAc(4)Sia(2)	Known Interaction	Q13740-P17301
22	2	[RJITLAYTLEADRDRRPPR]	ITA3	P26006	510	528	J511	[ARPEDVVNLDLKSTLRVLYNLFTK]	PARVB	Q9HBI1	336	359	K347	Hex(5)HexNAc(4)Fuc(2)Sia(1)	Known Interaction	Q9HBI1-P26006
21	71	[JITIVTGAPR]	ITA3	P26006	265	274	J265	[TPKDESANQEEPEAR]	VASP	P50552	284	298	K286	Hex(5)HexNAc(4)Fuc(1)Sia(1)	Known Interaction	P50552-P26006
21	31	[GPSTPLPEDPNWJVTEFHTTPO]	AMPN	P15144	253	274	J265	[YEKAEIKEMGEMHRELNA}	EPCAM	P16422	297	315	K299	Hex(5)HexNAc(4)Sia(1)	Known Interaction	P15144-P16422
21	26	[JITIVTGAPR]	ITA3	P26006	265	274	J265	[VDTKAAGSGELGVTmKGPKGLEELVKQK]	FLNB	O75369	477	504	K26	Hex(5)HexNAc(4)Sia(2)	Known Interaction	O75369-P26006
21	13	[NOJVTJR]	ITB1	P05556	92	98	J97	[LRTIVSIGDPKKK]	PAK2	Q13177	236	248	K247	Hex(5)HexNAc(4)Fuc(1)Sia(1)	Known Interaction	Q13177-P05556
21	11	[JVTJRSO]	ITB1	P05556	94	100	J94	[MGFFKR]	ITAV	P06756	1018	1023	K1022	Hex(5)HexNAc(4)Fuc(1)Sia(1)	Known Interaction	P05556-P06756
21	11	[LTSBATJASIBGDEARBVR]	LRP1	Q07954	3782	3800	J3788	[DKGDEEEEGEEKLEEK]	CALX	P27824	536	551	K547	Hex(5)HexNAc(4)Fuc(1)Sia(1)	Known Interaction	Q07954-P27824
21	11	[IOLDJYSTQELGOTIVYLDGSSQSBRFR]	5NTD	P21589	329	356	J333	[QPSKPEIVSK]	CD166	Q13740	133	142	K136	Hex(5)HexNAc(4)Fuc(2)Sia(1)	Known Interaction	P21589-Q13740
21	8	[NOJVTJR]	ITB1	P05556	92	98	J97	[NKPARWHKAKK]	UBR4	Q5T4S7	3607	3617	K3616	Hex(5)HexNAc(4)Fuc(1)Sia(1)	Known Interaction	Q5T4S7-P05556
21	8	[LLNINPJO]	LAMP1	P11279	255	262	J261	[KSETLK]	DJC13	O75165	79	84	K79	Hex(6)HexNAc(5)Fuc(1)Sia(1)	Known Interaction	P11279-O75165
21	4	[DIOONOJVTJRSO]	ITB1	P05556	88	100	J97	[LMDIKSR]	K1C19	P08727	366	372	K370	Hex(5)HexNAc(4)Fuc(1)Sia(1)	Known Interaction	P05556-P08727
20	72	[JATVVWmO]	CD166	Q13740	361	368	J361	[SKGGKYSVKDK]	L1CAM	P32004	1146	1156	K1147	Hex(5)HexNAc(4)Fuc(3)Sia(1)	Known Interaction	P32004-Q13740
20	21	[DIOONOJVTJR]	ITB1	P05556	88	98	J97	[EKELETGPKASHGYGGKFGVEQDR]	SRC8	Q14247	71	94	K87	Hex(5)HexNAc(4)Fuc(1)Sia(1)	Known Interaction	Q14247-P05556
20	21	[IJATDADEPNTLNSOISYR]	DSG2	Q14126	181	199	J182	[SDKKPDREEIQMSNMGSNTK]	CTND1	O60716	879	898	K882	Hex(5)HexNAc(4)Fuc(1)Sia(1)	Known Interaction	O60716-Q14126
20	17	[TAVJBSSDFDABLITO]	CD59	P13987	40	55	J43	[IKBEPKEGSLPLQYEWQK]	CXAR	P78310	160	177	K161	Hex(6)HexNAc(5)Fuc(1)Sia(1)	Known Interaction	P78310-P13987
20	15	[SBGEBIQAGPNBGWBTJSTFLQEGMPTSAR]	ITB1	P05556	34	63	J50	[TPKDESANQEEPEAR]	VASP	P50552	284	298	K286	Hex(5)HexNAc(4)Fuc(3)Sia(1)	Known Interaction	P05556-P50552
20	13	[SENFRHTOELNBRTASBSJVTBWLO]	ITA2	P17301	1039	1063	J1057	[IKLNGLENRVEVGK]	FLNB	O75369	947	960	K948	Hex(6)HexNAc(5)Fuc(1)Sia(1)	Known Interaction	P17301-O75369
20	11	[EJTSDPSLVIAFGR]	LAMP1	P11279	83	96	J84	[KSDTSQVK]	MPRI	P11717	386	393	K386	Hex(5)HexNAc(4)Fuc(1)Sia(1)	Known Interaction	P11279-P11717
20	10	[DTBTQEBSYFJITO]	ITB1	P05556	659	672	J669	[TAKGLDFEAK]	CADH1	P12830	438	447	K440	Hex(5)HexNAc(4)Fuc(2)Sia(1)	Known Interaction	P05556-P12830
20	6	[GQLSFNLRDPELRTHJLTDLSPHLR]	L1CAM	P32004	964	988	J979	[NLHTKWQK]	SPTN2	O15020	1311	1318	K1315	Hex(5)HexNAc(4)Fuc(2)Sia(1)	Known Interaction	P32004-O15020
20	6	[IIISPEEJVTLTBTAENQLER]	CD166	Q13740	473	493	J480	[LRKQNNGAFNETLFR]	TFR1	P02786	718	732	K720	Hex(5)HexNAc(4)Fuc(2)Sia(1)	Known Interaction	Q13740-P02786
20	6	[JITLAYTLEADR]	ITA3	P26006	511	522	J511	[VVPDSBBKTVVALBGQR]	CD151	P48509	179	195	K186	Hex(5)HexNAc(4)Sia(2)	Known Interaction	P48509-P26006
20	5	[VASVININPJTTHSTGSBRSHTALLR]	LAMP2	P13473	248	273	J257	[DARIGEAEAKRDAGIREAKAK]	FLOT1	O75955	175	195	K193	Hex(5)HexNAc(4)Fuc(1)Sia(1)	Known Interaction	P13473-O75955
20	4	[GSODIOONOJVTJRSO]	ITB1	P05556	85	100	J97	[GKIDAK]	FLNB	O75369	2317	2322	K2318	Hex(5)HexNAc(4)Fuc(1)Sia(1)	Known Interaction	P05556-O75369
19	26	[IJATDADEPNTLNSOISYR]	DSG2	Q14126	181	199	J182	[SDKKPDREEIQMSNMGSNTK]	CTND1	O60716	879	898	K881	Hex(5)HexNAc(4)Fuc(1)Sia(1)	Known Interaction	O60716-Q14126
19	17	[JITIVTGAPR]	ITA3	P26006	265	274	J265	[YSFGATBVKKBPR]	EGFR	P00533	285	297	K294	Hex(5)HexNAc(4)Fuc(1)Sia(1)	Known Interaction	P00533-P26006
19	15	[QYGSEGRFTFTSHTPGEHQIBLHSJSTO]	TMED9	Q9BVK6	101	128	J125	[KQmRILMVGLDAAGK]	ARF4	P18085	16	30	K16	Hex(5)HexNAc(4)Fuc(2)Sia(1)	Known Interaction	Q9BVK6-P18085
19	13	[AJTTQPGIVEGGQVLO]	ITAV	P06756	73	88	J74	[GDMRKBPFYAAEQDK]	HMOX2	P30519	260	274	K264	Hex(5)HexNAc(4)Fuc(2)Sia(1)	Known Interaction	P30519-P06756
19	12	[LNLQTSTSIPJVTEmO]	ITA2	P17301	95	110	J105	[ABARQENVFKK]	AGRIN	O00468	302	312	K311	Hex(5)HexNAc(4)Fuc(1)Sia(1)	Known Interaction	P17301-O00468
19	11	[GFIRPODBDVLTAVSEFFJASBVPVNNPO]	TRFM	P08582	497	525	J515	[NLGQKENGNYImYAR]	ADA10	O14672	406	420	K410	Hex(5)HexNAc(4)Fuc(1)Sia(1)	Known Interaction	P08582-O14672
19	10	[GEOODTBTQEBSYFJITO]	ITB1	P05556	655	672	J669	[NKNRNRYRDVSPFDHSR]	PTN1	P18031	40	56	K41	Hex(5)HexNAc(4)Sia(2)	Known Interaction	P05556-P18031
18	31	[ONOJVTJR]	ITB1	P05556	91	98	J97	[REKDKEKDK]	SPTB2	Q01082	2345	2353	K2351	Hex(5)HexNAc(4)Fuc(1)Sia(1)	Known Interaction	Q01082-P05556
18	18	[DTBTQEBSYFJITK]	ITB1	P05556	659	672	J669	[QQPNAGKK]	ITB4	P16144	871	878	K877	Hex(5)HexNAc(4)Fuc(1)Sia(1)	Known Interaction	P05556-P16144
18	17	[ONOJVTJRSO]	ITB1	P05556	91	100	J97	[NERSALNEVHLVVmRLLSVFMSRTKSGSK]	UBR4	Q5T4S7	3043	3071	K25	Hex(5)HexNAc(4)Fuc(1)Sia(1)	Known Interaction	Q5T4S7-P05556
18	15	[AFNOGEOODTBTQEBSYFJITO]	ITB1	P05556	651	672	J669	[DKTIIMWK]	RACK1	P63244	37	44	K38	Hex(5)HexNAc(4)Fuc(3)Sia(1)	Known Interaction	P05556-P63244
18	14	[LLNINPJO]	LAMP1	P11279	255	262	J261	[DSLLASLLDGVRASGNRDVBVKmTPTHK]	DJC13	O75165	312	339	K333	Hex(6)HexNAc(5)Fuc(1)Sia(1)	Known Interaction	O75165-P11279
18	13	[VBREAGJHTSGAGLVQINOSNGOETVVGR]	MPRD	P20645	77	105	J83	[TSDLGKSFK]	SORT	Q99523	289	297	K294	Hex(5)HexNAc(4)Fuc(1)Sia(1)	Known Interaction	P20645-Q99523
18	12	[NOJVTJR]	ITB1	P05556	92	98	J94	[BAQYWPQKEEK]	PTN1	P18031	121	131	K128	Hex(5)HexNAc(4)Fuc(1)Sia(1)	Known Interaction	P18031-P05556
18	12	[JVTJRSO]	ITB1	P05556	94	100	J97	[BKKYLSQK]	UBR4	Q5T4S7	1567	1574	K1569	Hex(5)HexNAc(4)Fuc(1)Sia(1)	Known Interaction	Q5T4S7-P05556
18	10	[QLVLJLTGNTLBAGGASDEOLISLIBRAVO]	PODXL	O00592	356	385	J360	[SKPGQFIR]	NHRF1	O14745	173	180	K174	Hex(5)HexNAc(4)Fuc(1)Sia(1)	Known Interaction	O00592-O14745
17	58	[EJTSDPSLVIAFGR]	LAMP1	P11279	83	96	J84	[QMKDKQDEEQR]	CALR	P27797	356	366	K360	Hex(5)HexNAc(4)Fuc(1)Sia(1)	Known Interaction	P11279-P27797
17	36	[EJTSDPSLVIAFGRGHTLTLNFTR]	LAMP1	P11279	83	106	J84	[GPLSAKGTADAFIVR]	MPRI	P11717	1025	1039	K1030	Hex(5)HexNAc(4)Fuc(1)Sia(1)	Known Interaction	P11279-P11717
17	30	[DTBTQEBSYFJITO]	ITB1	P05556	659	672	J669	[ADQDSEAmKR]	TLN1	Q9Y490	2446	2455	K2454	Hex(5)HexNAc(4)Sia(2)	Known Interaction	P05556-Q9Y490
17	27	[GSODIOONOJVTJR]	ITB1	P05556	85	98	J97	[SRKVPHTVLNLK]	AGRIN	O00468	1753	1764	K1755	Hex(5)HexNAc(4)Fuc(1)Sia(1)	Known Interaction	P05556-O00468
17	16	[ODFEDLYTPVJGSIVIVR]	TFR1	P02786	241	258	J251	[GLFGKK]	ARF1	P84077	11	16	K15	Hex(5)HexNAc(4)Fuc(2)Sia(1)	Known Interaction	P02786-P84077
17	10	[RJITLAYTLEADRDR]	ITA3	P26006	510	524	J511	[IDIQmKNR]	FLNB	O75369	692	699	K697	Hex(5)HexNAc(4)Sia(2)	Known Interaction	P26006-O75369
16	21	[VQPFJVTQGO]	LAMP2	P13473	352	361	J356	[EMVLSEKVSQLmEWTNKRPVIRMNGDKFR]	MAGT1	Q9H0U3	34	62	K27	Hex(5)HexNAc(4)Fuc(1)Sia(1)	Known Interaction	Q9H0U3-P13473
16	17	[DTBTQEBSYFJITO]	ITB1	P05556	659	672	J669	[ELAKMKQEPVKPEEGRDmANR]	RHOA	P61586	130	150	K140	Hex(5)HexNAc(4)Sia(2)	Known Interaction	P61586-P05556
16	12	[NOJVTJRSO]	ITB1	P05556	92	100	J94	[VKETADFK]	FLNA	P21333	497	504	K498	Hex(5)HexNAc(4)Fuc(1)Sia(1)	Known Interaction	P05556-P21333
16	11	[LJYTLSQGHR]	AMPN	P15144	127	136	J128	[EAGSQKDENLALYVENQFREFK]	TFR1	P02786	156	177	K161	Hex(5)HexNAc(4)Sia(2)	Known Interaction	P02786-P15144
15	40	[DNTTVTRLLNINPJO]	LAMP1	P11279	248	262	J261	[RKHKKDISENK]	HSP7C	P11142	247	257	K251	Hex(6)HexNAc(3)Sia(1)	Known Interaction	P11279-P11142
15	37	[JVTJRSO]	ITB1	P05556	94	100	J97	[LVRGGSGTKR]	VINC	P18206	1004	1013	K1012	Hex(5)HexNAc(4)Fuc(1)Sia(1)	Known Interaction	P18206-P05556
15	37	[VBREAGJHTSGAGLVQINO]	MPRD	P20645	77	95	J83	[EKEDLLBGATDGKK]	MPRI	P11717	469	482	K481	Hex(6)HexNAc(5)Fuc(1)Sia(1)	Known Interaction	P20645-P11717
15	24	[FTBKEATDVIIIHSKKLJYTLSQGHRVVLR]	AMPN	P15144	111	140	J128	[LGFFKR]	ITA2	P17301	1156	1161	K1160	Hex(5)HexNAc(4)Sia(1)	Known Interaction	P15144-P17301
15	22	[LVHANFGTOODFEDLYTPVJGSIVIVRAGO]	TFR1	P02786	232	261	J251	{MAKKTYDLLFKLLLIGDSGVGKTBVLFR]	RAB10	P61026	0	28	K21	Hex(5)HexNAc(4)Fuc(2)Sia(1)	Known Interaction	P02786-P61026
15	21	[JITLAYTLEADRDR]	ITA3	P26006	511	524	J511	[LAGLNIBTSGSATSBEEBLLIHPKBAWBSK]	ITB5	P18084	22	51	K45	Hex(5)HexNAc(4)Fuc(2)Sia(1)	Known Interaction	P18084-P26006
15	19	[NOJVTJR]	ITB1	P05556	92	98	J94	[LRKEAEQEAAR]	PLEC	Q15149	2275	2285	K2277	Hex(5)HexNAc(4)Fuc(1)Sia(1)	Known Interaction	Q15149-P05556
15	17	[OLGDBISEDSYPDGJITWYRNGO]	CD166	Q13740	153	175	J167	[QKmQQLEQMLTALDQMR]	STAT3	P40763	198	214	K199	Hex(5)HexNAc(4)Fuc(3)Sia(1)	Known Interaction	Q13740-P40763
15	14	[JITLAYTLEADRDRRPPRLR]	ITA3	P26006	511	530	J511	[VKIPVAIKELREATSPKANK]	EGFR	P00533	738	757	K754	Hex(5)HexNAc(4)Fuc(1)Sia(1)	Known Interaction	P26006-P00533
15	14	[TBPAGVmGEJNTLVWK]	EGFR	P00533	594	609	J603	[DKRmLVYKSEDIK]	ADA17	P78536	161	173	K168	Hex(5)HexNAc(4)Fuc(1)Sia(1)	Known Interaction	P00533-P78536
15	11	[ODTBTQEBSYFJITOVESRDO]	ITB1	P05556	658	678	J669	[WBNEHLKBVSKRIANLQTDLSDGLR]	FLNA	P21333	52	76	K58	Hex(5)HexNAc(4)Sia(2)	Known Interaction	P21333-P05556
14	35	[QPGEJGSIVTBGHR]	ITA4	P13612	134	147	J138	[KYGDPGSLFGFSLAMHWQLQPEDKR]	ITA6	P23229	36	60	K59	Hex(5)HexNAc(4)Fuc(1)Sia(1)	Known Interaction	P23229-P13612
14	19	[VPGJQTSTTLO]	L1CAM	P32004	668	678	J671	[LKDYEDLREDMR]	LAMC1	P11047	1304	1315	K1305	Hex(5)HexNAc(4)Fuc(1)Sia(1)	Known Interaction	P11047-P32004
14	19	[JATVVWMODNIR]	CD166	Q13740	361	372	J361	[LFHVRPVTQTDVYRADAKEIPR]	ROCK2	O75116	1205	1226	K1222	Hex(5)HexNAc(4)Fuc(3)Sia(1)	Known Interaction	O75116-Q13740
14	15	[EAGJHTSGAGLVQINK]	MPRD	P20645	80	95	J83	[LTAKSNBRYEIEWITEYABHR]	MPRI	P11717	300	320	K303	Hex(5)HexNAc(4)Fuc(3)Sia(1)	Known Interaction	P11717-P20645
14	14	[JVTJRSOGTAEO]	ITB1	P05556	94	105	J97	[VLLEmRKFR]	PTN1	P18031	249	257	K255	Hex(5)HexNAc(4)Fuc(1)Sia(1)	Known Interaction	P05556-P18031
14	13	[GEOODTBTQEBSYFJITOVESRDO]	ITB1	P05556	655	678	J669	[LKTKDEPQRETLK]	CD9	P21926	132	144	K133	Hex(5)HexNAc(4)Sia(2)	Known Interaction	P05556-P21926
14	11	[VBREAGJHTSGAGLVQINKSNGK]	MPRD	P20645	77	99	J83	[GEKARKGK]	MPRI	P11717	2456	2463	K2461	Hex(5)HexNAc(4)Fuc(1)Sia(1)	Known Interaction	P20645-P11717
14	10	[JITIVTGAPRHR]	ITA3	P26006	265	276	J265	[TKIISNR]	EGFR	P00533	488	494	K489	Hex(5)HexNAc(4)Fuc(1)Sia(1)	Known Interaction	P26006-P00533
14	10	[NOJVTJR]	ITB1	P05556	92	98	J94	[ITAAQHSVTGSAVSKTVBK]	PICAL	Q13492	10	28	K24	Hex(5)HexNAc(4)Fuc(1)Sia(1)	Known Interaction	Q13492-P05556
13	20	[TAVJBSSDFDABLITO]	CD59	P13987	40	55	J43	[SmPPSFGYSMKGATDIDK]	ITAV	P06756	429	446	K439	Hex(5)HexNAc(4)Sia(2)	Known Interaction	P06756-P13987
13	20	[ODJTTVTRLLNINPJO]	LAMP1	P11279	247	262	J249	[DIEGKKDIRAALAAERK]	DYN2	P50570	241	257	K245	Hex(6)HexNAc(5)Fuc(1)Sia(1)	Known Interaction	P50570-P11279
13	16	[DTBTQEBSYFJITK]	ITB1	P05556	659	672	J669	[FVNDTKDK]	ADA17	P78536	155	162	K160	Hex(5)HexNAc(4)Sia(2)	Known Interaction	P05556-P78536
13	15	[ODTBTQEBSYFJITOVESRDO]	ITB1	P05556	658	678	J669	[KLEAMTNSK]	VINC	P18206	373	381	K373	Hex(5)HexNAc(4)Fuc(1)Sia(1)	Known Interaction	P05556-P18206
13	15	[VQPFJVTQGO]	LAMP2	P13473	352	361	J356	[NATSDDIKK]	DNJC5	Q9H3Z4	25	33	K32	Hex(5)HexNAc(4)Fuc(2)Sia(1)	Known Interaction	P13473-Q9H3Z4
13	15	[TSIPTINMEJO]	ITA3	P26006	960	970	J969	[TVSDSIKK]	TLN1	Q9Y490	1639	1646	K1645	Hex(6)HexNAc(5)Fuc(1)Sia(1)	Known Interaction	P26006-Q9Y490
13	12	[JITIVTGAPR]	ITA3	P26006	265	274	J265	[SAMQTLKGIVRFLSKTDK]	ITA4	P13612	868	885	K882	Hex(5)HexNAc(4)Fuc(1)Sia(1)	Known Interaction	P13612-P26006
13	11	[GPSTPLPEDPNWJVTEFHTTPK]	AMPN	P15144	253	274	J265	[KYEKMTK]	ITA2	P17301	1162	1168	K1165	Hex(5)HexNAc(4)Sia(1)	Known Interaction	P15144-P17301
13	10	[GSODIOONOJVTJRSO]	ITB1	P05556	85	100	J94	[NRRLTVNEAVKEGVVGPELHHK]	PLEC	Q15149	2882	2903	K2892	Hex(5)HexNAc(4)Fuc(1)Sia(1)	Known Interaction	Q15149-P05556
13	10	[AJTTQPGIVEGGQVLK]	ITAV	P06756	73	88	J74	[BKKAPVKSBTEBVR]	ITB4	P16144	30	43	K36	Hex(5)HexNAc(4)Fuc(1)Sia(1)	Known Interaction	P16144-P06756
13	10	[ONOJVTJR]	ITB1	P05556	91	98	J97	[LmKIBMNEDPAK]	ILK	Q13418	424	435	K426	Hex(5)HexNAc(4)Fuc(1)Sia(1)	Known Interaction	Q13418-P05556
13	10	[JATVVWmODNIR]	CD166	Q13740	361	372	J361	[MNLEKQNAELRK]	ROCK2	O75116	839	850	K843	Hex(5)HexNAc(4)Fuc(3)Sia(1)	Known Interaction	O75116-Q13740
12	25	[SYBKNGVJGTGENGR]	ITB1	P05556	399	413	J406	[KIHFNWLPPSGKPmGYR]	ITB4	P16144	1142	1158	K1142	Hex(5)HexNAc(4)Fuc(1)Sia(1)	Known Interaction	P16144-P05556
12	12	[VQPFJVTQGO]	LAMP2	P13473	352	361	J356	[EEEKDK]	CALX	P27824	532	537	K535	Hex(5)HexNAc(4)Fuc(2)Sia(1)	Known Interaction	P13473-P27824
12	10	[JITIVTGAPR]	ITA3	P26006	265	274	J265	[LPLDKEPAREBAQR]	PLEC	Q15149	1146	1159	K1150	Hex(5)HexNAc(4)Fuc(1)Sia(1)	Known Interaction	Q15149-P26006
11	41	[LJYTLSQGHRVVLR]	AMPN	P15144	127	140	J128	[VIELNKDENVAHVLLEGLHHQRPKR]	ITA4	P13612	950	974	K973	Hex(5)HexNAc(4)Fuc(1)Sia(1)	Known Interaction	P13612-P15144
11	16	[ODJTTVTRLLNINPNO]	LAMP1	P11279	247	262	J249	[TQKDSSNKSGAEAKTQK]	TGON2	O43493	90	106	K103	Hex(5)HexNAc(4)Fuc(1)Sia(1)	Known Interaction	P11279-O43493
11	16	[VTGLJBTTNHPINPK]	ITA5	P08648	864	878	J868	[RNATGDYKBSLIDK]	CD166	Q13740	305	318	K312	Hex(5)HexNAc(4)Sia(2)	Known Interaction	P08648-Q13740
11	14	[JITLAYTLEADR]	ITA3	P26006	511	522	J511	[YSFGATBVKK]	EGFR	P00533	285	294	K293	Hex(5)HexNAc(4)Fuc(1)Sia(1)	Known Interaction	P26006-P00533
11	12	[ONOJVTJR]	ITB1	P05556	91	98	J97	[KVBQGTSNK]	EGFR	P00533	29	37	K29	Hex(5)HexNAc(4)Fuc(1)Sia(1)	Known Interaction	P00533-P05556
11	12	[IOLDJYSTQELGOTIVYLDGSSQSBR]	5NTD	P21589	329	354	J333	[YDDIKK]	G3P	P04406	255	260	K259	Hex(5)HexNAc(4)Fuc(2)Sia(1)	Known Interaction	P21589-P04406
11	10	[RJITLAYTLEADR]	ITA3	P26006	510	522	J511	[AEEESRSTSEKSK]	PLEC	Q15149	1911	1923	K1921	Hex(5)HexNAc(4)Fuc(1)Sia(1)	Known Interaction	P26006-Q15149
10	35	[GSODIOONOJVTJR]	ITB1	P05556	85	98	J97	[SRKVPHTVLNLK]	AGRIN	O00468	1753	1764	K1755	Hex(5)HexNAc(4)Fuc(1)Sia(1)	Known Interaction	P05556-O00468
10	23	[LSEGVTISYKSYBKNGVJGTGENGR]	ITB1	P05556	389	413	J406	[HTKELNBRTASBSJVTBWLKDVHMK]	ITA2	P17301	1044	1068	K1046	Hex(5)HexNAc(4)Fuc(1)Sia(1)	Known Interaction	P17301-P05556
10	23	[EAGJHTSGAGLVQINOSNGOETVVGR]	MPRD	P20645	80	105	J83	[mFVNNEHDLQVBKR]	AAK1	Q2M2I8	76	89	K88	Hex(5)HexNAc(4)Fuc(2)Sia(1)	Known Interaction	P20645-Q2M2I8
10	17	[THJLTDLSPHLR]	L1CAM	P32004	977	988	J979	[KQTSGMEYK]	CALX	P27824	507	515	K507	Hex(5)HexNAc(4)Fuc(1)Sia(1)	Known Interaction	P32004-P27824
10	15	[DIOONOJVTJR]	ITB1	P05556	88	98	J97	[KFVIKPIDKK]	EZRI	P15311	254	263	K262	Hex(5)HexNAc(4)Fuc(1)Sia(1)	Known Interaction	P05556-P15311
10	14	[KDJTTVTR]	LAMP1	P11279	247	254	J249	[AABAVKPQEVQmVJGTITNPINGK]	MPRI	P11717	2123	2146	K2128	Hex(5)HexNAc(4)Fuc(1)Sia(1)	Known Interaction	P11717-P11279
10	14	[DPELRTHJLTDLSPHLR]	L1CAM	P32004	972	988	J979	[GNNRWKQSVELBKK]	CLH1	Q00610	1517	1530	K1529	Hex(5)HexNAc(4)Fuc(2)Sia(1)	Known Interaction	P32004-Q00610
10	14	[GYYJQSEDGSHTLQR]	HLAC	P10321	107	121	J110	[YVQKGEYR]	CD44	P16070	155	162	K158	Hex(5)HexNAc(4)Sia(2)	Known Interaction	P10321-P16070
10	12	[TAVJBSSDFDABLITO]	CD59	P13987	40	55	J43	[FKQBLSK]	COG3	Q96JB2	252	258	K253	Hex(5)HexNAc(4)Fuc(1)Sia(1)	Known Interaction	P13987-Q96JB2
10	12	[DTBTQEBSYFJITOVESRDO]	ITB1	P05556	659	678	J669	[LLGITKEBVmR]	TLN1	Q9Y490	329	339	K334	Hex(5)HexNAc(4)Fuc(2)Sia(1)	Known Interaction	P05556-Q9Y490
10	12	[KLJYTLSQGHRVVLR]	AMPN	P15144	126	140	J128	[REFAKFEK]	ITB1	P05556	761	768	K765	Hex(6)HexNAc(3)Sia(1)	Known Interaction	P15144-P05556
10	11	[NOJVTJRSOGTAEO]	ITB1	P05556	92	105	J97	[KTYTLTDYLK]	DPP4	P27487	41	50	K41	Hex(5)HexNAc(4)Fuc(1)Sia(1)	Known Interaction	P05556-P27487
10	10	[JITIVTGAPR]	ITA3	P26006	265	274	J265	[SLAQAEAEKQKEEAER]	PLEC	Q15149	1793	1808	K1801	Hex(5)HexNAc(3)Sia(1)	Known Interaction	Q15149-P26006
10	10	[RJITLAYTLEADR]	ITA3	P26006	510	522	J511	[EKQEEQARLLDELAGK]	LAMB1	P07942	1369	1384	K1370	Hex(5)HexNAc(4)Fuc(1)Sia(1)	Known Interaction	P07942-P26006
813	593	[EAESLQPmTVVGTDYVFHJDTO]	PLXB2	O15031	1031	1052	J1049	[JVTVOSEGAIQVNFTLVR]	CBPD	O75976	855	872	K859	Hex(5)HexNAc(4)Fuc(2)Sia(1)	Unknown Interaction	O15031-O75976
714	293	[ITASARGYNPVTKJVTVK]	CBPD	O75976	842	859	J855	[OLQEQLMGAVVMEOPNIR]	VPS4A	Q9UN37	108	125	K121	Hex(5)HexNAc(4)Fuc(2)Sia(1)	Unknown Interaction	O75976-Q9UN37
549	116	[JVTVKSEGAIQVNFTLVR]	CBPD	O75976	855	872	J855	[VAAAETAOHQAO]	UTRO	P46939	3058	3069	K3065	Hex(5)HexNAc(4)Fuc(2)Sia(1)	Unknown Interaction	O75976-P46939
409	199	[THJLTDLSPHLR]	L1CAM	P32004	977	988	J979	[DVPNOSGAEO]	TGON2	O43493	205	214	K209	Hex(5)HexNAc(5)Fuc(1)Sia(1)	Unknown Interaction	P32004-O43493
398	107	[GDKJVTMGQSSAR]	AGRE5	P48960	368	380	J371	[LOGDVDVSGPO]	AHNK	Q09666	3307	3317	K3308	Hex(5)HexNAc(4)Fuc(1)Sia(1)	Unknown Interaction	P48960-Q09666
341	187	[VPVTLALJNTLFLIEER]	AMPN	P15144	674	690	J681	[LSEOPOPNGRTVEVAEGEAVR]	LYRIC	Q86UE4	122	142	K127	Hex(5)HexNAc(4)Sia(1)	Unknown Interaction	P15144-Q86UE4
305	102	[KLJYTLSQGHR]	AMPN	P15144	126	136	J128	[IVIEOQGO]	AP2M1	Q96CW1	220	227	K224	Hex(5)HexNAc(4)Sia(1)	Unknown Interaction	P15144-Q96CW1
294	103	[KLJYTLSQGHR]	AMPN	P15144	126	136	J128	[OPRDPTOO]	FERM2	Q96AC1	143	150	K143	Hex(5)HexNAc(4)Fuc(1)Sia(1)	Unknown Interaction	P15144-Q96AC1
278	203	[EJTSDPSLVIAFGR]	LAMP1	P11279	83	96	J84	[OPAALOPO]	MAP1B	P46821	751	758	K751	Hex(5)HexNAc(4)Fuc(1)Sia(1)	Unknown Interaction	P11279-P46821
277	127	[THJLTDLSPHLR]	L1CAM	P32004	977	988	J979	[RELEAOAGELAR]	HIP1R	O75146	519	530	K524	Hex(5)HexNAc(5)Fuc(1)Sia(1)	Unknown Interaction	P32004-O75146
277	109	[JVTMGQSSAR]	AGRE5	P48960	371	380	J371	[VEGDLOGPEIDIO]	AHNK	Q09666	4410	4422	K4415	Hex(5)HexNAc(4)Fuc(1)Sia(1)	Unknown Interaction	P48960-Q09666
269	120	[GHTLTLJFTR]	LAMP1	P11279	97	106	J103	[LMLLQIOGR]	SVIL	O95425	1443	1451	K1449	Hex(6)HexNAc(3)Sia(1)	Unknown Interaction	P11279-O95425
267	164	[EAGJHTSGAGLVQINK]	MPRD	P20645	80	95	J83	[DGOLVSESSDVLPO}	K2C8	P05787	470	484	K472	Hex(5)HexNAc(4)Fuc(3)Sia(1)	Unknown Interaction	P20645-P05787
261	119	[LGDBISEDSYPDGJITWYRNGK]	CD166	Q13740	154	175	J167	[AOLOPGAPLOPO]	FLNB	O75369	240	251	K241	Hex(5)HexNAc(5)Fuc(1)Sia(1)	Unknown Interaction	Q13740-O75369
255	116	[JITIVTGAPR]	ITA3	P26006	265	274	J265	[GOOPDIDITGPO]	AHNK	Q09666	3373	3384	K3374	Hex(5)HexNAc(4)Fuc(1)Sia(1)	Unknown Interaction	P26006-Q09666
253	124	[TBSSJLTLTSGSKHK]	CDCP1	Q9H5V8	382	396	J386	[LOPGAPLOPOLNPO]	FLNB	O75369	242	255	K243	Hex(5)HexNAc(4)Fuc(2)Sia(1)	Unknown Interaction	Q9H5V8-O75369
252	146	[JLTVBPDGALFEQK]	AT1B3	P54709	124	137	J124	[OQFOPGLAYVGO]	CPMD8	Q8IZJ3	354	365	K357	Hex(5)HexNAc(4)Fuc(3)Sia(1)	Unknown Interaction	P54709-Q8IZJ3
243	121	[VPVTLALJNTLFLIEER]	AMPN	P15144	674	690	J681	[NRDLOVVO]	COR1C	Q9ULV4	399	406	K403	Hex(5)HexNAc(4)Sia(1)	Unknown Interaction	P15144-Q9ULV4
240	105	[VPVTLALJNTLFLIEER]	AMPN	P15144	674	690	J681	[AAOPTTTPEVOAAR]	MAP1B	P46821	2299	2312	K2309	Hex(5)HexNAc(4)Sia(1)	Unknown Interaction	P15144-P46821
229	168	[VQPFJVTQGK]	LAMP2	P13473	352	361	J356	[VOTPEMIIQOPO]	AHNK	Q09666	488	499	K489	Hex(5)HexNAc(4)Fuc(1)Sia(1)	Unknown Interaction	P13473-Q09666
224	127	[LJYTLSQGHRVVLR]	AMPN	P15144	127	140	J128	[TSLSALTQLMOO]	STXB3	O00186	322	333	K332	Hex(5)HexNAc(4)Sia(1)	Unknown Interaction	P15144-O00186
206	135	[LJYTLSQGHR]	AMPN	P15144	127	136	J128	[AAAOQLIAHLQVFSO]	UTP20	O75691	910	924	K913	Hex(5)HexNAc(4)Sia(1)	Unknown Interaction	P15144-O75691
201	120	[JITIVTGAPR]	ITA3	P26006	265	274	J265	[LOVQEQELTRLR]	DESP	P15924	1528	1539	K1529	Hex(5)HexNAc(3)Sia(1)	Unknown Interaction	P26006-P15924
191	148	[JITIVTGAPR]	ITA3	P26006	265	274	J265	[HONIVRLHDVLHSDO]	CDK5	Q00535	60	74	K61	Hex(5)HexNAc(4)Fuc(1)Sia(1)	Unknown Interaction	P26006-Q00535
181	135	[JITIVTGAPRHR]	ITA3	P26006	265	276	J265	[AOIRLLHFTAAAYYHLNAVR]	ASPM	Q8IZT6	3104	3123	K3105	Hex(5)HexNAc(3)Sia(1)	Unknown Interaction	P26006-Q8IZT6
181	133	[LDJYSTQELGKTIVYLDGSSQSBR]	5NTD	P21589	331	354	J333	[OAATBLQAAYR]	ASPM	Q8IZT6	1803	1813	K1803	Hex(6)HexNAc(5)Fuc(1)Sia(1)	Unknown Interaction	P21589-Q8IZT6
180	152	[YTLDPJITSAGPTK]	PLXB1	O43157	1248	1261	J1253	[RGLOPSBTIIPLMOO]	FAS	P49327	773	787	K776	Hex(5)HexNAc(4)Fuc(2)Sia(1)	Unknown Interaction	O43157-P49327
180	124	[AEFJITLIHPK]	AMPN	P15144	231	241	J234	[RGSGOPRPO]	AFAD	P55196	1117	1125	K1121	Hex(6)HexNAc(3)Sia(1)	Unknown Interaction	P15144-P55196
180	105	[RJITLAYTLEADR]	ITA3	P26006	510	522	J511	[OPAALOPO]	MAP1B	P46821	751	758	K751	Hex(5)HexNAc(4)Fuc(1)Sia(1)	Unknown Interaction	P26006-P46821
179	89	[JATVVWMODNIR]	CD166	Q13740	361	372	J361	[NGSONLGO]	MPRI	P11717	543	550	K546	Hex(5)HexNAc(4)Fuc(2)Sia(1)	Unknown Interaction	Q13740-P11717
176	203	[LSHDAJETLPLHLYVK]	PLXB2	O15031	728	743	J733	[IPPITNIFPLPERFBEALDSOGIO]	AGRL2	O95490	455	478	K475	Hex(5)HexNAc(5)Fuc(1)Sia(1)	Unknown Interaction	O15031-O95490
173	131	[IKLDJYSTQELGK]	5NTD	P21589	329	341	J333	[OASSLTPLAAQOQ}	ILRL1	Q01638	544	557	K544	Hex(5)HexNAc(4)Fuc(1)Sia(1)	Unknown Interaction	P21589-Q01638
172	121	[VPGJQTSTTLK]	L1CAM	P32004	668	678	J671	[LOTEAEIALO]	PLEC	Q15149	1985	1994	K1986	Hex(5)HexNAc(4)Fuc(1)Sia(1)	Unknown Interaction	P32004-Q15149
165	131	[VPGJQTSTTLK]	L1CAM	P32004	668	678	J671	[QLVOSGAISAIO]	NELFE	P18615	67	78	K70	Hex(5)HexNAc(4)Fuc(1)Sia(1)	Unknown Interaction	P32004-P18615
163	129	[JITIVTGAPR]	ITA3	P26006	265	274	J265	[GAOPOLMSAISO]	FAS	P49327	1867	1878	K1869	Hex(5)HexNAc(4)Fuc(1)Sia(1)	Unknown Interaction	P26006-P49327
161	185	[GNNHBVPBOAGHFQJTSSPSAR]	TNR3	P36941	163	184	J177	[LFLEAFOALGGO]	FCGRN	P55899	97	108	K103	Hex(5)HexNAc(4)Fuc(3)Sia(1)	Unknown Interaction	P36941-P55899
161	122	[JITIVTGAPR]	ITA3	P26006	265	274	J265	[IIPGGIADRHGGLOR]	LIN7C	Q9NUP9	122	136	K135	Hex(5)HexNAc(4)Fuc(1)Sia(1)	Unknown Interaction	P26006-Q9NUP9
150	143	[VQPFJVTQGK]	LAMP2	P13473	352	361	J356	[LQGEIAHVOO]	K22E	P35908	406	415	K414	Hex(5)HexNAc(4)Sia(1)	Unknown Interaction	P13473-P35908
150	141	[TSIPTINMEJK]	ITA3	P26006	960	970	J969	[OGHVLLDLLEVLSGQQLPR]	SYNE2	Q8WXH0	63	81	K63	Hex(5)HexNAc(4)Sia(1)	Unknown Interaction	P26006-Q8WXH0
147	115	[KDJTTVTR]	LAMP1	P11279	247	254	J249	[VGIDTPDIDIHGPEGOLO]	AHNK	Q09666	4560	4577	K4575	Hex(5)HexNAc(4)Fuc(1)Sia(1)	Unknown Interaction	P11279-Q09666
147	105	[KLJYTLSQGHR]	AMPN	P15144	126	136	J128	[VELGEOPLRIIGVOVHPGQR]	ESYT1	Q9BSJ8	184	203	K189	Hex(5)HexNAc(4)Sia(2)	Unknown Interaction	P15144-Q9BSJ8
144	111	[GDKJVTMGQSSAR]	AGRE5	P48960	368	380	J371	[ENPGLTQDIIMOILEO]	PDC10	Q9BUL8	54	69	K65	Hex(5)HexNAc(4)Fuc(1)Sia(1)	Unknown Interaction	P48960-Q9BUL8
143	111	[NGVJGTGENGRK]	ITB1	P05556	403	414	J406	[AVEHINOTIAPALVSO]	ENOA	P06733	65	80	K71	Hex(5)HexNAc(4)Fuc(1)Sia(1)	Unknown Interaction	P05556-P06733
142	112	[VQPFJVTQGK]	LAMP2	P13473	352	361	J356	[AOLOPGAPLOPO]	FLNB	O75369	240	251	K241	Hex(5)HexNAc(4)Fuc(1)Sia(1)	Unknown Interaction	P13473-O75369
140	131	[VQPFJVTQGK]	LAMP2	P13473	352	361	J356	[DQRSIIOTPO]	TAB2	Q9NYJ8	647	656	K653	Hex(5)HexNAc(4)Fuc(1)Sia(1)	Unknown Interaction	P13473-Q9NYJ8
138	149	[LJYTLSQGHR]	AMPN	P15144	127	136	J128	[OPTQASITOVO]	STXB6	Q8NFX7	56	66	K56	Hex(5)HexNAc(4)Sia(1)	Unknown Interaction	P15144-Q8NFX7
135	114	[AEFJITLIHPK]	AMPN	P15144	231	241	J234	[AGOLSFISVGNO]	MYO6	Q9UM54	635	646	K637	Hex(5)HexNAc(4)Sia(1)	Unknown Interaction	P15144-Q9UM54
131	118	[JITIVTGAPRHR]	ITA3	P26006	265	276	J265	[OPAALOPOVPO]	MAP1B	P46821	751	761	K756	Hex(5)HexNAc(3)Sia(1)	Unknown Interaction	P26006-P46821
127	261	[LLNINPJK]	LAMP1	P11279	255	262	J261	[VLEALLPLOGLEERVAAAVDLIIO]	FAS	P49327	2383	2406	K2391	Hex(6)HexNAc(3)Sia(1)	Unknown Interaction	P11279-P49327
125	111	[THJLTDLSPHLR]	L1CAM	P32004	977	988	J979	[LMLOFNRQBGSTOO}	VN1R5	Q7Z5H4	344	358	K347	Hex(5)HexNAc(5)Fuc(1)Sia(1)	Unknown Interaction	P32004-Q7Z5H4
125	109	[FNQBJTTR]	PPB1	P05187	140	147	J144	[VISGVLQLGNIVFOO]	MYH9	P35579	342	356	K355	Hex(5)HexNAc(4)Fuc(1)Sia(1)	Unknown Interaction	P05187-P35579
123	111	[LJYTLSQGHR]	AMPN	P15144	127	136	J128	[OPQRPONSLFO]	EXOC4	Q96A65	433	443	K438	Hex(5)HexNAc(4)Sia(1)	Unknown Interaction	P15144-Q96A65
121	103	[LJYTLSQGHRVVLR]	AMPN	P15144	127	140	J128	[AGOPHLVLGLLWQIIO]	PLST	P13797	221	236	K223	Hex(5)HexNAc(4)Sia(1)	Unknown Interaction	P15144-P13797
119	112	[VQPFJVTQGK]	LAMP2	P13473	352	361	J356	[ONLEDGINNLO]	SYNE2	Q8WXH0	2700	2710	K2700	Hex(5)HexNAc(4)Sia(1)	Unknown Interaction	P13473-Q8WXH0
118	128	[AEFJITLIHPK]	AMPN	P15144	231	241	J234	[QTAQQIVSHVQNOGTPPPO]	F120A	Q9NZB2	117	135	K129	Hex(5)HexNAc(4)Sia(1)	Unknown Interaction	P15144-Q9NZB2
114	105	[VQPFJVTQGK]	LAMP2	P13473	352	361	J356	[LAPLTTPOPR]	SARG	Q9BW04	290	299	K297	Hex(5)HexNAc(4)Fuc(2)Sia(1)	Unknown Interaction	P13473-Q9BW04
112	154	[TBSSJLTLTSGSK]	CDCP1	Q9H5V8	382	394	J386	[RGAOTPSTNVOPO]	PALLD	Q8WX93	143	155	K146	Hex(5)HexNAc(4)Sia(2)	Unknown Interaction	Q9H5V8-Q8WX93
112	139	[KDJTTVTR]	LAMP1	P11279	247	254	J249	[NVONGSDLGISQOPITIR]	RTN3	O95197	796	813	K808	Hex(5)HexNAc(4)Fuc(1)Sia(1)	Unknown Interaction	P11279-O95197
112	121	[JITIVTGAPR]	ITA3	P26006	265	274	J265	[IGLODPTVPAVO]	SYNE2	Q8WXH0	1453	1464	K1456	Hex(5)HexNAc(3)Sia(1)	Unknown Interaction	P26006-Q8WXH0
111	115	[DFEDLYTPVJGSIVIVRAGK]	TFR1	P02786	242	261	J251	[TSFDOPDQMAALFOR]	NCKP1	Q9Y2A7	882	896	K886	Hex(5)HexNAc(4)Fuc(3)Sia(1)	Unknown Interaction	P02786-Q9Y2A7
108	143	[JITIVTGAPR]	ITA3	P26006	265	274	J265	[ITVPLVSEVQIAQLRFPVPOGVLR]	ESYT2	A0FGR8	365	388	K384	Hex(5)HexNAc(3)Sia(1)	Unknown Interaction	P26006-A0FGR8
104	113	[JATVVWMK]	CD166	Q13740	361	368	J361	[LQTYOTAVETAVLLLRIDDIVSGHO]	TCPG	P49368	503	527	K507	Hex(5)HexNAc(4)Fuc(3)Sia(1)	Unknown Interaction	Q13740-P49368
103	105	[VTGLJBTTNHPINPK]	ITA5	P08648	864	878	J868	[TLROMQTAATLIQSNYR]	ASPM	Q8IZT6	2185	2201	K2188	Hex(5)HexNAc(4)Fuc(2)Sia(1)	Unknown Interaction	P08648-Q8IZT6
20	61	[RJITLAYTLEADRDRRPPR]	ITA3	P26006	510	528	J511	[APKISmPDIDFNLKGPKVK]	AHNK	Q09666	4382	4400	K4384	Hex(5)HexNAc(4)Sia(2)	Unknown Interaction	P26006-Q09666
394	163	[AOQBJGTSmBWBVNTAGVR]	EPCAM	P16422	107	125	J111	[AREOPYDSOSLR]	EPCAM	P16422	152	163	K155	Hex(5)HexNAc(3)Sia(1)	IntraXL	P16422-P16422
356	128	[AEFJITLIHPO]	AMPN	P15144	231	241	J234	[OVVATTQmQAADAR]	AMPN	P15144	205	218	K205	Hex(6)HexNAc(3)Sia(1)	IntraXL	P15144-P15144
340	256	[JATVVWMODNIRLR]	CD166	Q13740	361	374	J361	[JATVVWmODNIR]	CD166	Q13740	361	372	K368	Hex(5)HexNAc(4)Fuc(3)Sia(1)	IntraXL	Q13740-Q13740
339	115	[OLJYTLSQGHR]	AMPN	P15144	126	136	J128	[OVVATTQmQAADARO]	AMPN	P15144	205	219	K205	Hex(5)HexNAc(4)Fuc(1)Sia(1)	IntraXL	P15144-P15144
339	112	[OLJYTLSQGHRVVLR]	AMPN	P15144	126	140	J128	[YRLPNTLOPDSYR]	AMPN	P15144	74	86	K81	Hex(5)HexNAc(4)Sia(1)	IntraXL	P15144-P15144
239	371	[DNTTVTRLLNINPJO]	LAMP1	P11279	248	262	J261	[ODNTTVTRLLNINPJO]	LAMP1	P11279	247	262	K247	Hex(6)HexNAc(3)Sia(1)	IntraXL	P11279-P11279
133	119	[AEFJITLIHPO]	AMPN	P15144	231	241	J234	[OVVATTQMQAADARO]	AMPN	P15144	205	219	K205	Hex(6)HexNAc(3)Sia(1)	IntraXL	P15144-P15144
102	87	[JITIVTGAPRHR]	ITA3	P26006	265	276	J265	[OLLLSINVTNTR]	ITA3	P26006	650	661	K650	Hex(5)HexNAc(3)Sia(1)	IntraXL	P26006-P26006
